# Supplementary material for: Characterization of Indoor Molds after Ajka Red Mud Spill, Hungary
Source: MDPI journal article supplement (doi:10.3390/pathogens13010022), 2023-12-26
Supplement: s1 [file s1]

# Characterization of indoor molds after Ajka red mud spill, Hungary

## Supplementary material

### Contents

|                |    |
|----------------|----|
| Comments       | 1  |
| Water activity | 2  |
| Substrate      | 16 |
| pH             | 31 |

### Comments

- **Figures:**
  - **Lines** indicate the average colony diameter calculated on the basis of 3 replicates in a given treatment
  - **Dots** also represent the average for the days, added to the graphs for possible overlapping lines (*jittered dots, not the actual values, but “shaken” so they don’t overlap, and more visible*)
  - The **shaded areas** around the lines represent the scatter of the colony diameter
    - \* often the dimensions of the 3 replicates are exactly the same, so there is no scatter
- **ANOVA:**
  - for each strain, the effect of treatments was compared by ANOVA
  - the results obtained may not be reliable because there are few replicates and often the dimensions of the replicates are exactly the same within a treatment
  - in the ANOVA table, **p-value** ( $\Pr(>F)$ ) if less than 0.05, then at least one of the means of the treatments is different from the others
- **Dunnett-test:**
  - pairwise comparison of individual treatments
  - in all cases the control group is the reference for comparisons
  - in the table, **diff** is the difference from the control group (**lwr.ci** & **upr.ci** are the corresponding 95% confidence intervals)
  - and **pval** is the p-value, if less than 0.05 then there is a significant difference between the control and the other treatment

# Water activity

[1] "T398A"

Figure S1. Water activity – T398A

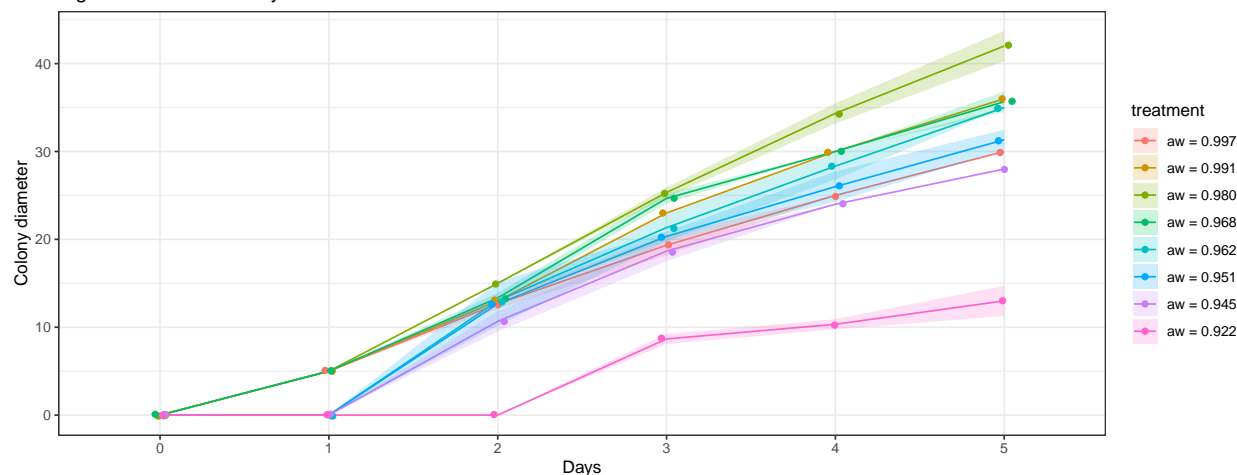

[1] "ANOVA results:"

|                         | Df | Sum Sq | Mean Sq | F value | Pr(>F)     |
|-------------------------|----|--------|---------|---------|------------|
| data_stat_id\$treatment | 7  | 15384  | 2198    | 743     | <2e-16 *** |
| Residuals               | 16 | 47     | 3       |         |            |

---

Signif. codes: 0 '\*\*\*' 0.001 '\*\*' 0.01 '\*' 0.05 '.' 0.1 ' ' 1

[1] ""

[1] "#####"

[1] ""

[1] "Dunnett-test results:"

Dunnett's test for comparing several treatments with a control :  
95% family-wise confidence level

\$'aw = 0.997'

|                       | diff     | lwr.ci   | upr.ci   | pval        |
|-----------------------|----------|----------|----------|-------------|
| aw = 0.991-aw = 0.997 | 15.0000  | 10.8950  | 19.1050  | 2.4e-09 *** |
| aw = 0.980-aw = 0.997 | 29.6667  | 25.5617  | 33.7717  | < 2e-16 *** |
| aw = 0.968-aw = 0.997 | 16.6667  | 12.5617  | 20.7717  | 8.9e-09 *** |
| aw = 0.962-aw = 0.997 | 5.6667   | 1.5617   | 9.7717   | 0.0055 **   |
| aw = 0.951-aw = 0.997 | -1.6667  | -5.7717  | 2.4383   | 0.7388      |
| aw = 0.945-aw = 0.997 | -10.6667 | -14.7717 | -6.5617  | 3.1e-06 *** |
| aw = 0.922-aw = 0.997 | -60.0000 | -64.1050 | -55.8950 | < 2e-16 *** |

---

Signif. codes: 0 '\*\*\*' 0.001 '\*\*' 0.01 '\*' 0.05 '.' 0.1 ' ' 1

[1] ""

[1] "#####"

[1] "#####"

[1] ""

[1] "T398B"

Figure S2. Water activity – T398B

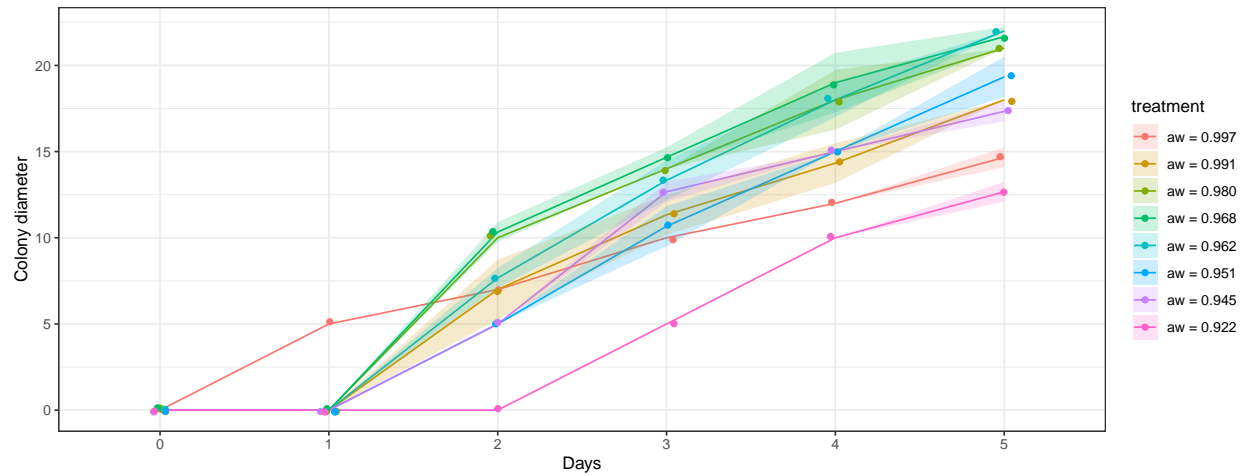

[1] "ANOVA results:"

|                         | Df | Sum Sq | Mean Sq | F value | Pr(>F)      |
|-------------------------|----|--------|---------|---------|-------------|
| data_stat_id\$treatment | 7  | 3005   | 429     | 210     | 1.5e-14 *** |
| Residuals               | 16 | 33     | 2       |         |             |

---

Signif. codes: 0 '\*\*\*' 0.001 '\*\*' 0.01 '\*' 0.05 '.' 0.1 ' ' 1

[1] ""

[1] "#####"

[1] ""

[1] "Dunnett-test results:"

Dunnett's test for comparing several treatments with a control :  
95% family-wise confidence level

\$'aw = 0.997'

|                       | diff     | lwr.ci   | upr.ci   | pval        |
|-----------------------|----------|----------|----------|-------------|
| aw = 0.991-aw = 0.997 | 2.0000   | -1.4102  | 5.4102   | 0.4001      |
| aw = 0.980-aw = 0.997 | 14.3333  | 10.9231  | 17.7436  | 9.4e-11 *** |
| aw = 0.968-aw = 0.997 | 17.0000  | 13.5898  | 20.4102  | 6.3e-14 *** |
| aw = 0.962-aw = 0.997 | 12.3333  | 8.9231   | 15.7436  | 2.3e-08 *** |
| aw = 0.951-aw = 0.997 | 1.3333   | -2.0769  | 4.7436   | 0.7669      |
| aw = 0.945-aw = 0.997 | 1.3333   | -2.0769  | 4.7436   | 0.7669      |
| aw = 0.922-aw = 0.997 | -21.0000 | -24.4102 | -17.5898 | 5.3e-10 *** |

---

Signif. codes: 0 '\*\*\*' 0.001 '\*\*' 0.01 '\*' 0.05 '.' 0.1 ' ' 1

[1] ""

[1] "#####"

[1] "#####"

[1] ""

[1] "T399"

Figure S3. Water activity – T399

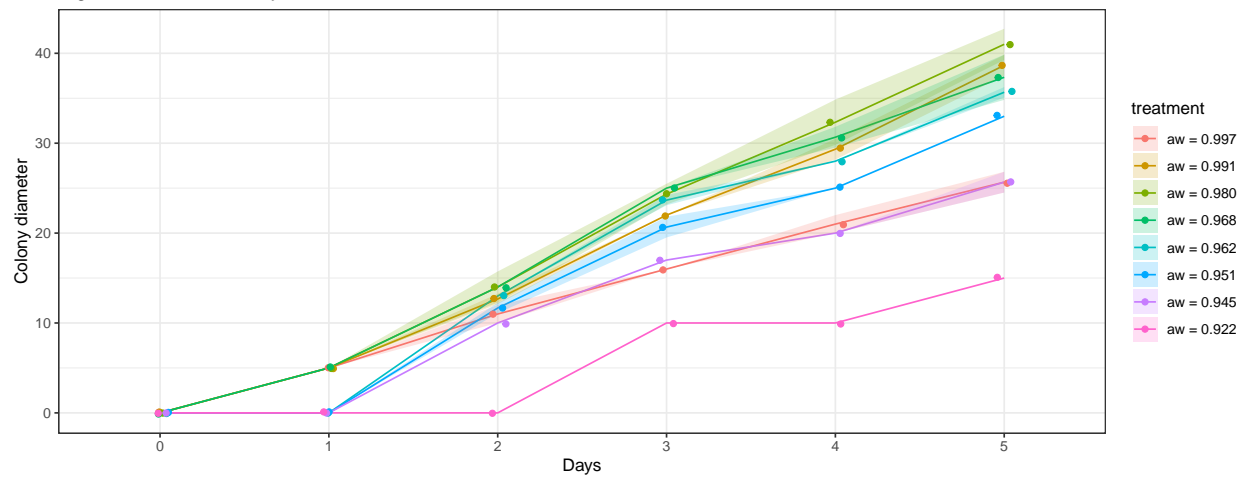

[1] "ANOVA results:"

|                         | Df | Sum Sq | Mean Sq | F value | Pr(>F)     |
|-------------------------|----|--------|---------|---------|------------|
| data_stat_id\$treatment | 7  | 15187  | 2170    | 579     | <2e-16 *** |
| Residuals               | 16 | 60     | 4       |         |            |

---

Signif. codes: 0 '\*\*\*' 0.001 '\*\*' 0.01 '\*' 0.05 '.' 0.1 ' ' 1

[1] ""

[1] "#####"

[1] ""

[1] "Dunnett-test results:"

Dunnett's test for comparing several treatments with a control :  
95% family-wise confidence level

\$'aw = 0.997'

|                       | diff    | lwr.ci   | upr.ci   | pval        |
|-----------------------|---------|----------|----------|-------------|
| aw = 0.991-aw = 0.997 | 29.000  | 24.3783  | 33.6217  | < 2e-16 *** |
| aw = 0.980-aw = 0.997 | 38.000  | 33.3783  | 42.6217  | < 2e-16 *** |
| aw = 0.968-aw = 0.997 | 33.333  | 28.7116  | 37.9551  | < 2e-16 *** |
| aw = 0.962-aw = 0.997 | 21.667  | 17.0449  | 26.2884  | 4.0e-12 *** |
| aw = 0.951-aw = 0.997 | 11.667  | 7.0449   | 16.2884  | 6.8e-06 *** |
| aw = 0.945-aw = 0.997 | -6.000  | -10.6217 | -1.3783  | 0.0089 **   |
| aw = 0.922-aw = 0.997 | -43.667 | -48.2884 | -39.0449 | < 2e-16 *** |

---

Signif. codes: 0 '\*\*\*' 0.001 '\*\*' 0.01 '\*' 0.05 '.' 0.1 ' ' 1

[1] ""

[1] "#####"

[1] "#####"

[1] ""

[1] "T401A"

Figure S4. Water activity – T401A

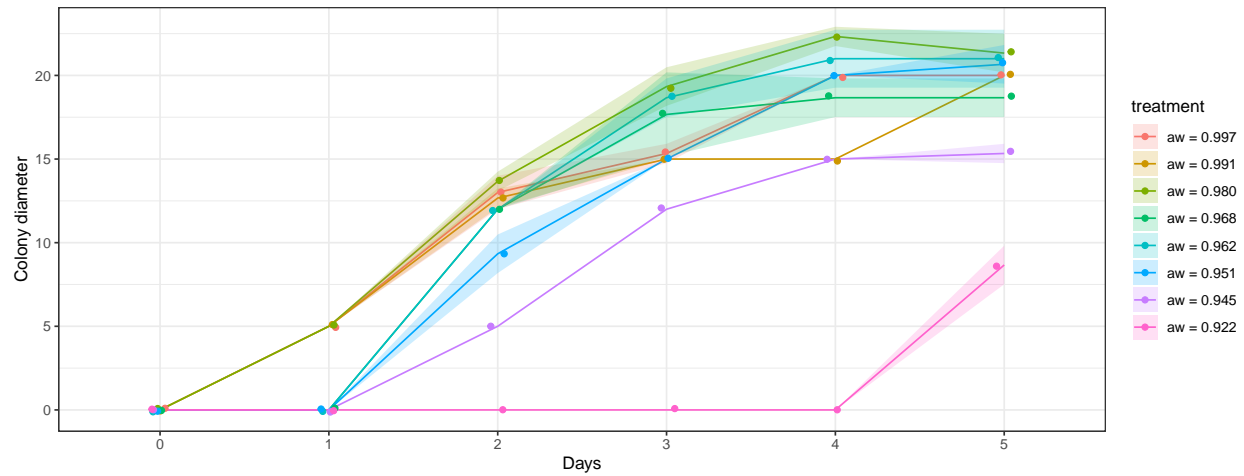

```
[1] "ANOVA results:"
```

```

              Df Sum Sq Mean Sq F value Pr(>F)
data_stat_id$treatment  7  11204    1601    272  2e-15 ***
Residuals              16    94      6
---

```

```
Signif. codes:  0 '***' 0.001 '**' 0.01 '*' 0.05 '.' 0.1 ' ' 1
```

```
[1] ""
```

```
[1] "#####"
```

```
[1] ""
```

```
[1] "Dunnett-test results:"
```

Dunnett's test for comparing several treatments with a control :  
95% family-wise confidence level

```
$'aw = 0.997'
```

|                       | diff      | lwr.ci   | upr.ci    | pval        |
|-----------------------|-----------|----------|-----------|-------------|
| aw = 0.991-aw = 0.997 | -5.66667  | -11.4515 | 0.11821   | 0.0561 .    |
| aw = 0.980-aw = 0.997 | 8.33333   | 2.5485   | 14.11821  | 0.0038 **   |
| aw = 0.968-aw = 0.997 | -6.33333  | -12.1182 | -0.54846  | 0.0293 *    |
| aw = 0.962-aw = 0.997 | -0.66667  | -6.4515  | 5.11821   | 0.9995      |
| aw = 0.951-aw = 0.997 | -8.33333  | -14.1182 | -2.54846  | 0.0038 **   |
| aw = 0.945-aw = 0.997 | -26.00000 | -31.7849 | -20.21513 | 2.7e-11 *** |
| aw = 0.922-aw = 0.997 | -64.66667 | -70.4515 | -58.88179 | < 2e-16 *** |

```
---
```

```
Signif. codes:  0 '***' 0.001 '**' 0.01 '*' 0.05 '.' 0.1 ' ' 1
```

```
[1] ""
```

```
[1] "#####"
```

```
[1] "#####"
```

```
[1] ""
```

```
[1] "T401B"
```

Figure S5. Water activity – T401B

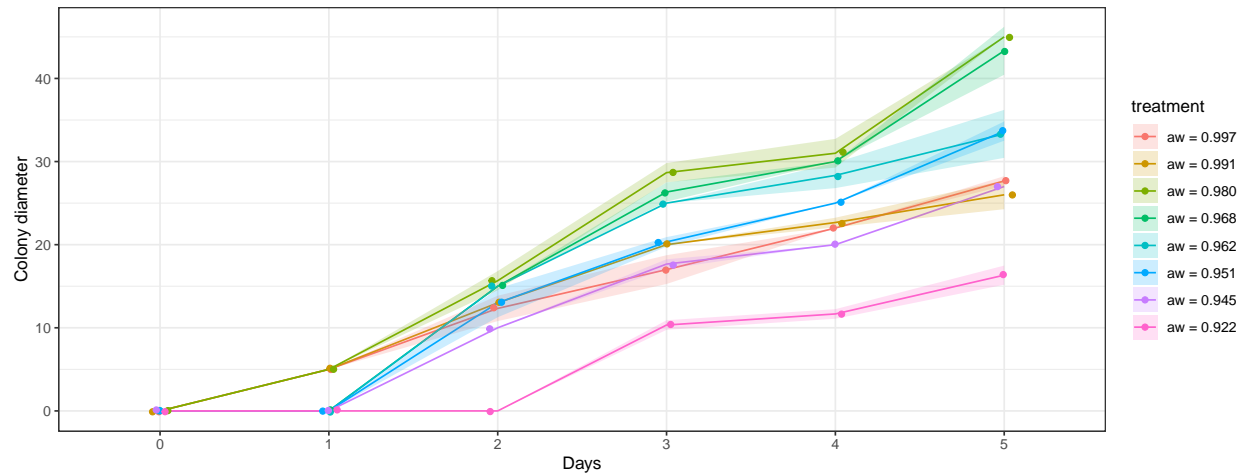

```
[1] "ANOVA results:"
              Df Sum Sq Mean Sq F value    Pr(>F)
data_stat_id$treatment  7  14843      2120      278 1.7e-15 ***
Residuals              16    122         8
---
Signif. codes:  0 '***' 0.001 '**' 0.01 '*' 0.05 '.' 0.1 ' ' 1
[1] ""
[1] "#####"
[1] ""
[1] "Dunnett-test results:"
```

Dunnett's test for comparing several treatments with a control :  
95% family-wise confidence level

```
$'aw = 0.997'
      diff    lwr.ci    upr.ci    pval
aw = 0.991-aw = 0.997  2.6667 -3.9237  9.257  0.7413
aw = 0.980-aw = 0.997 41.3333 34.7430 47.924 4.6e-15 ***
aw = 0.968-aw = 0.997 30.6667 24.0763 37.257 2.3e-10 ***
aw = 0.962-aw = 0.997 17.6667 11.0763 24.257 1.9e-06 ***
aw = 0.951-aw = 0.997  8.0000  1.4096 14.590 0.0144 *
aw = 0.945-aw = 0.997 -9.3333 -15.9237 -2.743 0.0043 **
aw = 0.922-aw = 0.997 -45.6667 -52.2570 -39.076 < 2e-16 ***
```

```
---
Signif. codes:  0 '***' 0.001 '**' 0.01 '*' 0.05 '.' 0.1 ' ' 1
[1] ""
[1] "#####"
[1] "#####"
[1] ""
[1] "TD12"
```

Figure S6. Water activity – TD12

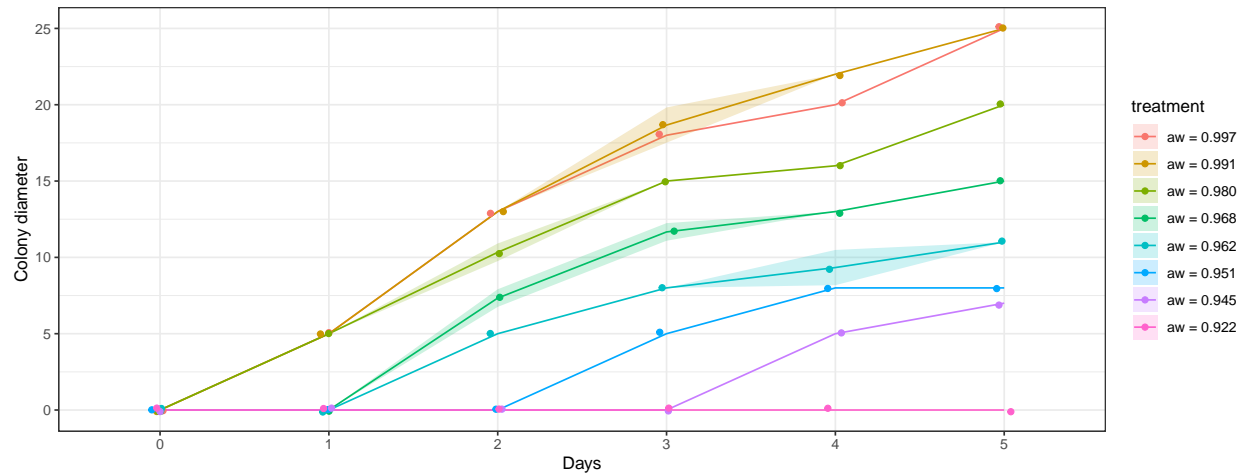

[1] "ANOVA results:"

|                         | Df | Sum Sq | Mean Sq | F value | Pr(>F)     |
|-------------------------|----|--------|---------|---------|------------|
| data_stat_id\$treatment | 7  | 21137  | 3020    | 6039    | <2e-16 *** |
| Residuals               | 16 | 8      | 0       |         |            |

---

Signif. codes: 0 '\*\*\*' 0.001 '\*\*' 0.01 '\*' 0.05 '.' 0.1 ' ' 1

[1] ""

[1] "#####"

[1] ""

[1] "Dunnett-test results:"

Dunnett's test for comparing several treatments with a control :  
95% family-wise confidence level

\$'aw = 0.997'

|                       | diff     | lwr.ci    | upr.ci   | pval       |
|-----------------------|----------|-----------|----------|------------|
| aw = 0.991-aw = 0.997 | 2.6667   | 0.97905   | 4.3543   | 0.0016 **  |
| aw = 0.980-aw = 0.997 | -14.6667 | -16.35429 | -12.9790 | <2e-16 *** |
| aw = 0.968-aw = 0.997 | -34.0000 | -35.68762 | -32.3124 | <2e-16 *** |
| aw = 0.962-aw = 0.997 | -47.6667 | -49.35429 | -45.9790 | <2e-16 *** |
| aw = 0.951-aw = 0.997 | -60.0000 | -61.68762 | -58.3124 | <2e-16 *** |
| aw = 0.945-aw = 0.997 | -69.0000 | -70.68762 | -67.3124 | <2e-16 *** |
| aw = 0.922-aw = 0.997 | -81.0000 | -82.68762 | -79.3124 | <2e-16 *** |

---

Signif. codes: 0 '\*\*\*' 0.001 '\*\*' 0.01 '\*' 0.05 '.' 0.1 ' ' 1

[1] ""

[1] "#####"

[1] "#####"

[1] ""

[1] "TD16"

Figure S7. Water activity – TD16

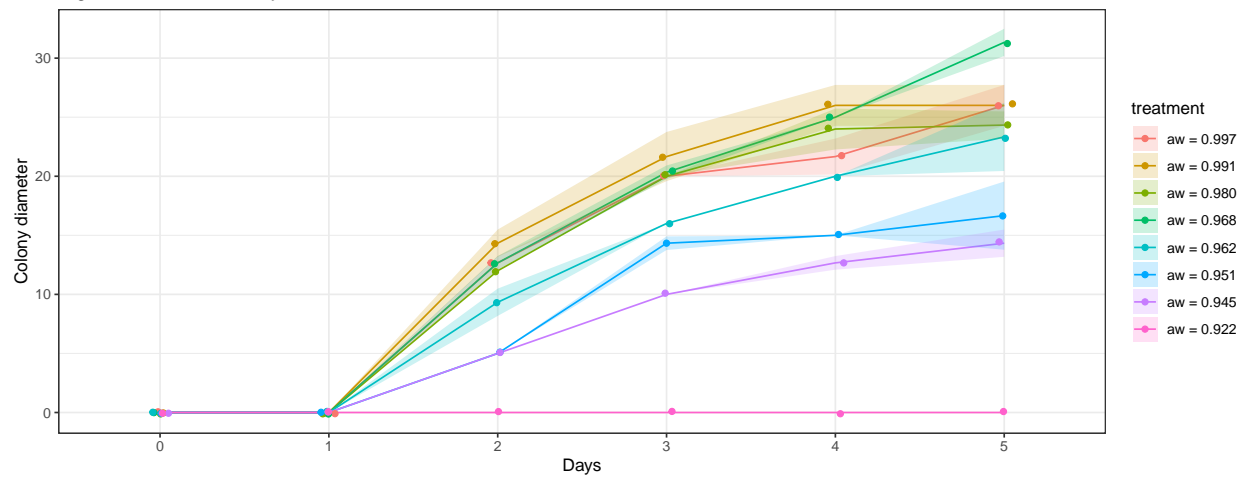

```
[1] "ANOVA results:"
              Df Sum Sq Mean Sq F value Pr(>F)
data_stat_id$treatment  7  19509      2787    582 <2e-16 ***
Residuals              16    77        5
---
Signif. codes:  0 '***' 0.001 '**' 0.01 '*' 0.05 '.' 0.1 ' ' 1
[1] ""
[1] "#####"
[1] ""
[1] "Dunnett-test results:"

Dunnett's test for comparing several treatments with a control :
  95% family-wise confidence level
```

```
$'aw = 0.997'
      diff   lwr.ci   upr.ci    pval
aw = 0.991-aw = 0.997  7.6667  2.4423 12.8910 0.00337 **
aw = 0.980-aw = 0.997  0.0000 -5.2244  5.2244 1.00000
aw = 0.968-aw = 0.997  9.0000  3.7756 14.2244 0.00071 ***
aw = 0.962-aw = 0.997 -11.6667 -16.8910 -6.4423 8.2e-05 ***
aw = 0.951-aw = 0.997 -29.3333 -34.5577 -24.1090 6.7e-13 ***
aw = 0.945-aw = 0.997 -38.3333 -43.5577 -33.1090 < 2e-16 ***
aw = 0.922-aw = 0.997 -80.3333 -85.5577 -75.1090 < 2e-16 ***
```

```
---
Signif. codes:  0 '***' 0.001 '**' 0.01 '*' 0.05 '.' 0.1 ' ' 1
[1] ""
[1] "#####"
[1] "#####"
[1] ""
[1] "TD22"
```



Figure S8. Water activity – TD22

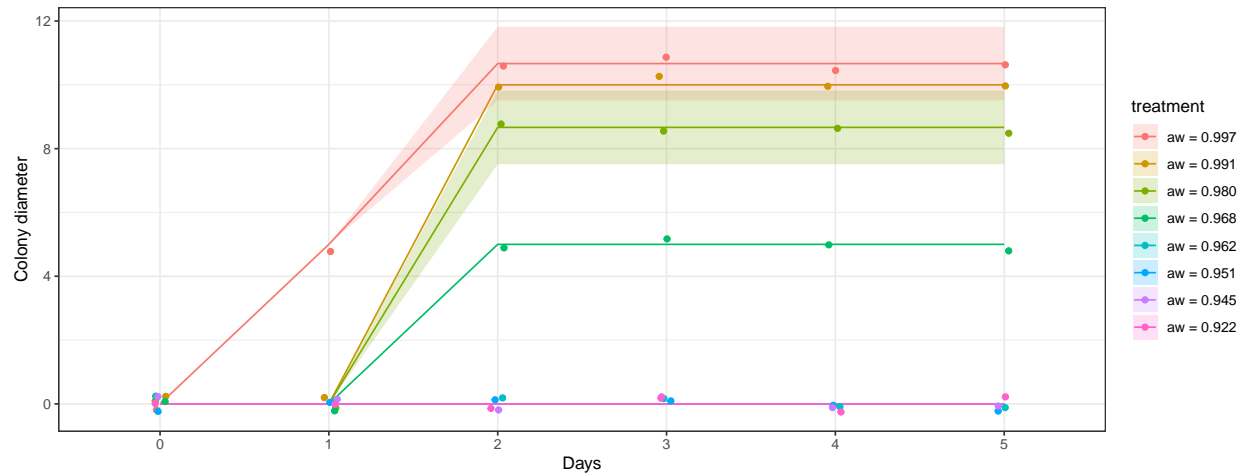

```
[1] "ANOVA results:"
```

|                         | Df | Sum Sq | Mean Sq | F value | Pr(>F)      |
|-------------------------|----|--------|---------|---------|-------------|
| data_stat_id\$treatment | 7  | 8825   | 1261    | 236     | 6.2e-15 *** |
| Residuals               | 16 | 85     | 5       |         |             |

```
---
```

```
Signif. codes:  0 '***' 0.001 '**' 0.01 '*' 0.05 '.' 0.1 ' ' 1
```

```
[1] ""
```

```
[1] "#####"
```

```
[1] ""
```

```
[1] "Dunnett-test results:"
```

Dunnett's test for comparing several treatments with a control :  
95% family-wise confidence level

```
$'aw = 0.997'
```

|                       | diff     | lwr.ci  | upr.ci   | pval        |
|-----------------------|----------|---------|----------|-------------|
| aw = 0.991-aw = 0.997 | -7.6667  | -13.178 | -2.1549  | 0.0050 **   |
| aw = 0.980-aw = 0.997 | -13.0000 | -18.512 | -7.4883  | 2.1e-05 *** |
| aw = 0.968-aw = 0.997 | -27.6667 | -33.178 | -22.1549 | 8.8e-12 *** |
| aw = 0.962-aw = 0.997 | -47.6667 | -53.178 | -42.1549 | < 2e-16 *** |
| aw = 0.951-aw = 0.997 | -47.6667 | -53.178 | -42.1549 | < 2e-16 *** |
| aw = 0.945-aw = 0.997 | -47.6667 | -53.178 | -42.1549 | < 2e-16 *** |
| aw = 0.922-aw = 0.997 | -47.6667 | -53.178 | -42.1549 | < 2e-16 *** |

```
---
```

```
Signif. codes:  0 '***' 0.001 '**' 0.01 '*' 0.05 '.' 0.1 ' ' 1
```

```
[1] ""
```

```
[1] "#####"
```

```
[1] "#####"
```

```
[1] ""
```

```
[1] "TD25"
```

Figure S9. Water activity – TD25

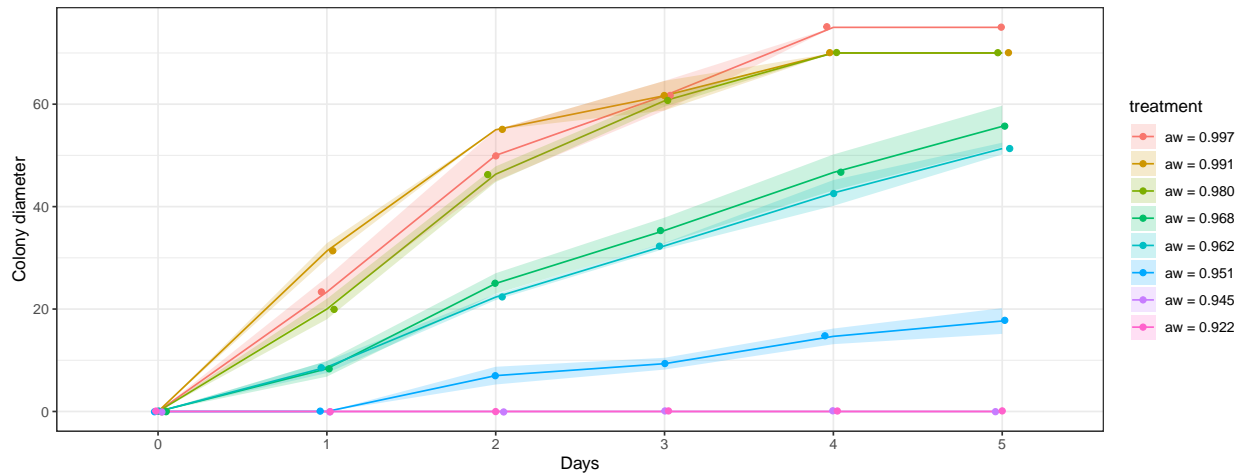

```
[1] "ANOVA results:"
              Df Sum Sq Mean Sq F value Pr(>F)
data_stat_id$treatment  7 320055    45722    3670 <2e-16 ***
Residuals              16    199      12
---
Signif. codes:  0 '***' 0.001 '**' 0.01 '*' 0.05 '.' 0.1 ' ' 1
[1] ""
[1] "#####"
[1] ""
[1] "Dunnett-test results:"

Dunnett's test for comparing several treatments with a control :
  95% family-wise confidence level
```

```
$'aw = 0.997'
              diff    lwr.ci    upr.ci    pval
aw = 0.991-aw = 0.997    3.00    -5.424    11.424  0.8285
aw = 0.980-aw = 0.997   -18.00   -26.424   -9.576  8.2e-05 ***
aw = 0.968-aw = 0.997  -114.00  -122.424 -105.576 < 2e-16 ***
aw = 0.962-aw = 0.997  -127.67  -136.091 -119.243 < 2e-16 ***
aw = 0.951-aw = 0.997  -236.33  -244.757 -227.909 < 2e-16 ***
aw = 0.945-aw = 0.997  -285.00  -293.424 -276.576 < 2e-16 ***
aw = 0.922-aw = 0.997  -285.00  -293.424 -276.576 < 2e-16 ***
```

```
---
Signif. codes:  0 '***' 0.001 '**' 0.01 '*' 0.05 '.' 0.1 ' ' 1
[1] ""
[1] "#####"
[1] "#####"
[1] ""
[1] "TD4"
```

Figure S10. Water activity – TD4

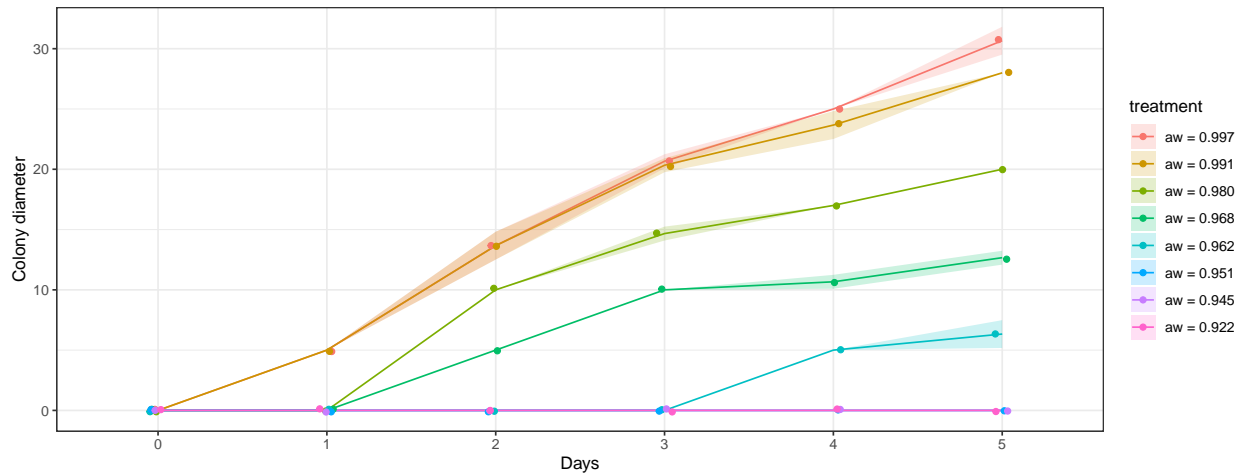

```
[1] "ANOVA results:"
              Df Sum Sq Mean Sq F value Pr(>F)
data_stat_id$treatment  7  34860      4980   6291 <2e-16 ***
Residuals              16    13        1
---
Signif. codes:  0 '***' 0.001 '**' 0.01 '*' 0.05 '.' 0.1 ' ' 1
[1] ""
[1] "#####"
[1] ""
[1] "Dunnett-test results:"
```

Dunnett's test for comparing several treatments with a control :  
95% family-wise confidence level

```
$'aw = 0.997'
              diff      lwr.ci      upr.ci      pval
aw = 0.991-aw = 0.997 -4.3333  -6.4569  -2.2098 9.4e-05 ***
aw = 0.980-aw = 0.997 -33.3333 -35.4569 -31.2098 < 2e-16 ***
aw = 0.968-aw = 0.997 -56.6667 -58.7902 -54.5431 < 2e-16 ***
aw = 0.962-aw = 0.997 -83.6667 -85.7902 -81.5431 < 2e-16 ***
aw = 0.951-aw = 0.997 -95.0000 -97.1235 -92.8765 < 2e-16 ***
aw = 0.945-aw = 0.997 -95.0000 -97.1235 -92.8765 < 2e-16 ***
aw = 0.922-aw = 0.997 -95.0000 -97.1235 -92.8765 < 2e-16 ***
```

```
---
Signif. codes:  0 '***' 0.001 '**' 0.01 '*' 0.05 '.' 0.1 ' ' 1
[1] ""
[1] "#####"
[1] "#####"
[1] ""
[1] "TD5"
```

Figure S11. Water activity – TD5

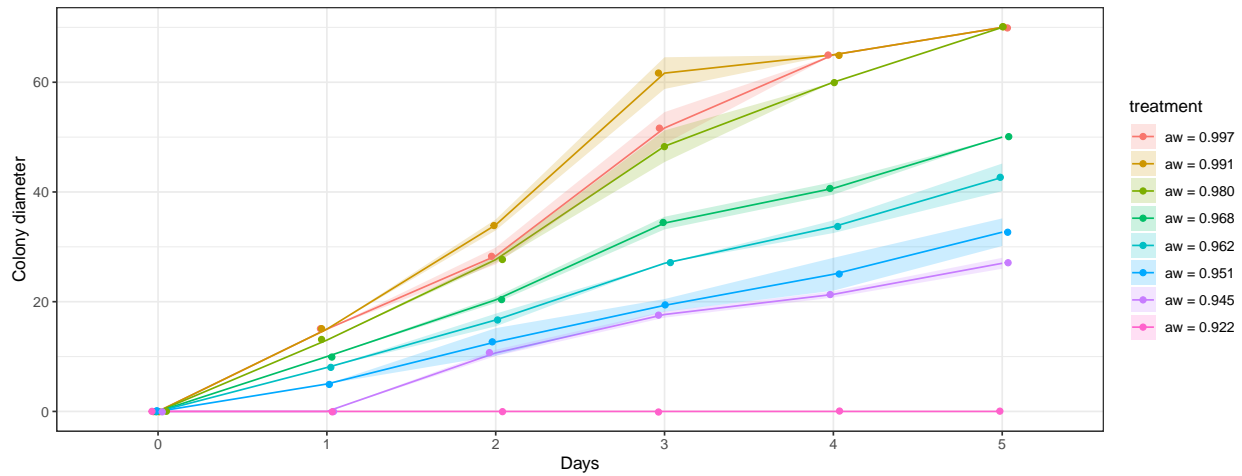

```
[1] "ANOVA results:"
              Df Sum Sq Mean Sq F value Pr(>F)
data_stat_id$treatment  7 154333    22048    2043 <2e-16 ***
Residuals              16    173      11
---
Signif. codes:  0 '***' 0.001 '**' 0.01 '*' 0.05 '.' 0.1 ' ' 1
[1] ""
[1] "#####"
[1] ""
[1] "Dunnett-test results:"

Dunnett's test for comparing several treatments with a control :
  95% family-wise confidence level

$`aw = 0.997`
      diff      lwr.ci      upr.ci    pval
aw = 0.991-aw = 0.997   15.667    7.8263   23.5070 0.00022 ***
aw = 0.980-aw = 0.997  -11.000   -18.8403   -3.1597 0.00477 **
aw = 0.968-aw = 0.997  -74.667   -82.5070  -66.8263 < 2e-16 ***
aw = 0.962-aw = 0.997 -102.000 -109.8403  -94.1597 < 2e-16 ***
aw = 0.951-aw = 0.997 -135.333 -143.1737 -127.4930 < 2e-16 ***
aw = 0.945-aw = 0.997 -153.333 -161.1737 -145.4930 < 2e-16 ***
aw = 0.922-aw = 0.997 -230.000 -237.8403 -222.1597 < 2e-16 ***
---
Signif. codes:  0 '***' 0.001 '**' 0.01 '*' 0.05 '.' 0.1 ' ' 1

[1] ""
[1] "#####"
[1] "#####"
[1] ""
[1] "TD6"
```

Figure S12. Water activity – TD6

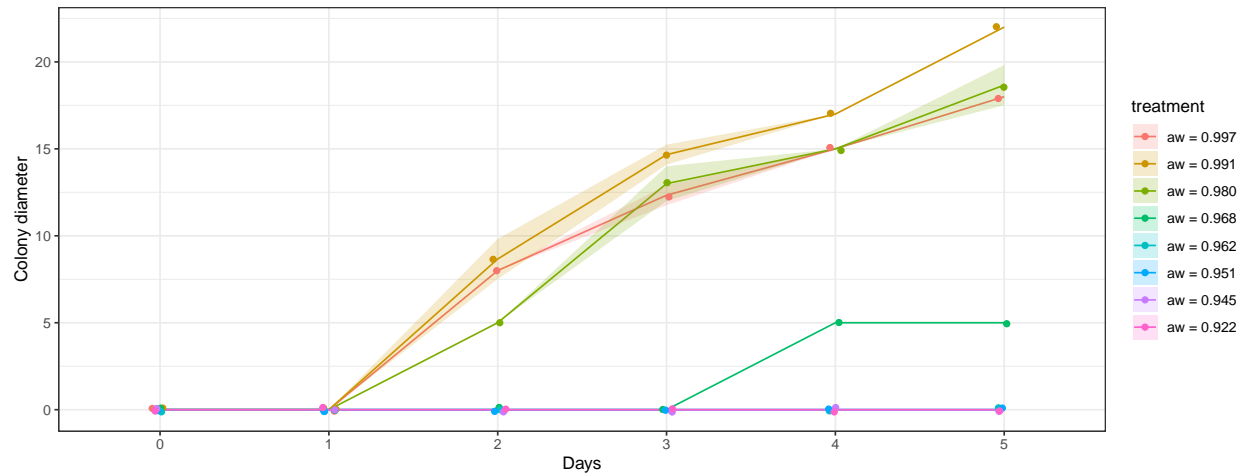

```
[1] "ANOVA results:"
              Df Sum Sq Mean Sq F value Pr(>F)
data_stat_id$treatment  7  16705      2386   19092 <2e-16 ***
Residuals              16     2         0
---
Signif. codes:  0 '***' 0.001 '**' 0.01 '*' 0.05 '.' 0.1 ' ' 1
[1] ""
[1] "#####"
[1] ""
[1] "Dunnett-test results:"

Dunnett's test for comparing several treatments with a control :
  95% family-wise confidence level
```

```
$'aw = 0.997'
              diff      lwr.ci      upr.ci      pval
aw = 0.991-aw = 0.997   9.0000   8.1562   9.84381 < 2e-16 ***
aw = 0.980-aw = 0.997  -1.6667  -2.5105  -0.82286 0.00015 ***
aw = 0.968-aw = 0.997 -43.3333 -44.1771 -42.48952 < 2e-16 ***
aw = 0.962-aw = 0.997 -53.3333 -54.1771 -52.48952 < 2e-16 ***
aw = 0.951-aw = 0.997 -53.3333 -54.1771 -52.48952 < 2e-16 ***
aw = 0.945-aw = 0.997 -53.3333 -54.1771 -52.48952 < 2e-16 ***
aw = 0.922-aw = 0.997 -53.3333 -54.1771 -52.48952 < 2e-16 ***
```

```
---
Signif. codes:  0 '***' 0.001 '**' 0.01 '*' 0.05 '.' 0.1 ' ' 1
[1] ""
[1] "#####"
[1] "#####"
[1] ""
[1] "TD8"
```

Figure S13. Water activity – TD8

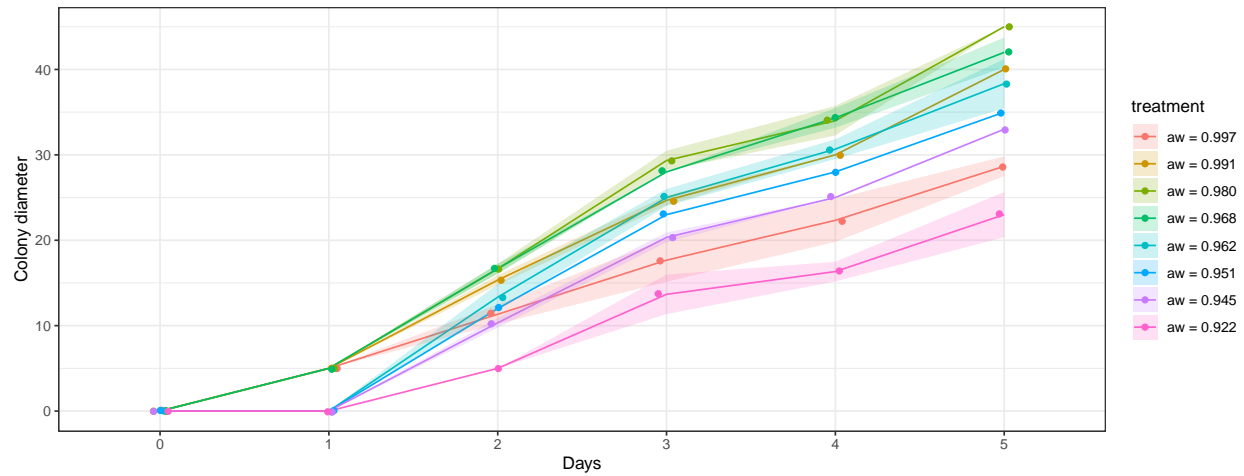

```
[1] "ANOVA results:"
              Df Sum Sq Mean Sq F value    Pr(>F)
data_stat_id$treatment  7  11905      1701      292 1.2e-15 ***
Residuals              16    93         6
---
Signif. codes:  0 '***' 0.001 '**' 0.01 '*' 0.05 '.' 0.1 ' ' 1
[1] ""
[1] "#####"
[1] ""
[1] "Dunnett-test results:"
```

Dunnett's test for comparing several treatments with a control :  
95% family-wise confidence level

```
$'aw = 0.997'
              diff      lwr.ci      upr.ci      pval
aw = 0.991-aw = 0.997  30.0000  24.2357  35.764 2.3e-14 ***
aw = 0.980-aw = 0.997  45.0000  39.2357  50.764 < 2e-16 ***
aw = 0.968-aw = 0.997  41.0000  35.2357  46.764 < 2e-16 ***
aw = 0.962-aw = 0.997  22.3333  16.5690  28.098 2.1e-09 ***
aw = 0.951-aw = 0.997  13.0000   7.2357  18.764 2.9e-05 ***
aw = 0.945-aw = 0.997   3.6667  -2.0977   9.431 0.3244
aw = 0.922-aw = 0.997 -27.0000 -32.7643 -21.236 2.1e-13 ***
```

```
---
Signif. codes:  0 '***' 0.001 '**' 0.01 '*' 0.05 '.' 0.1 ' ' 1
[1] ""
[1] "#####"
[1] "#####"
[1] ""
[1] "TD9"
```

Figure S14. Water activity – TD9

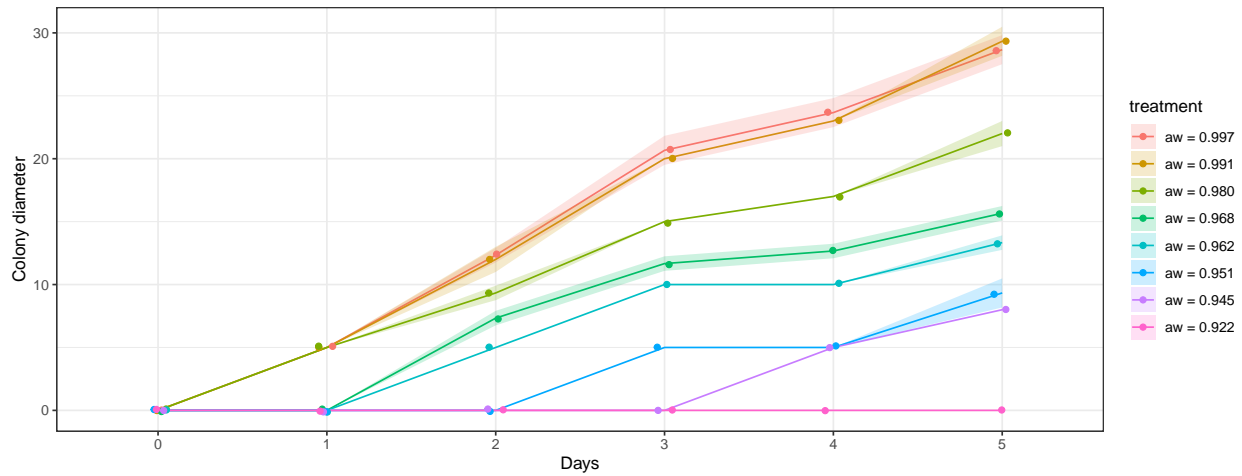

```
[1] "ANOVA results:"
              Df Sum Sq Mean Sq F value Pr(>F)
data_stat_id$treatment  7  24954      3565    1901 <2e-16 ***
Residuals              16    30         2
---
Signif. codes:  0 '***' 0.001 '**' 0.01 '*' 0.05 '.' 0.1 ' ' 1
[1] ""
[1] "#####"
[1] ""
[1] "Dunnett-test results:"
```

Dunnett's test for comparing several treatments with a control :  
95% family-wise confidence level

```
$'aw = 0.997'
              diff      lwr.ci      upr.ci    pval
aw = 0.991-aw = 0.997 -1.000   -4.2681     2.2681  0.9030
aw = 0.980-aw = 0.997 -22.000  -25.2681  -18.7319 <2e-16 ***
aw = 0.968-aw = 0.997 -43.000  -46.2681  -39.7319 <2e-16 ***
aw = 0.962-aw = 0.997 -52.000  -55.2681  -48.7319 <2e-16 ***
aw = 0.951-aw = 0.997 -71.000  -74.2681  -67.7319 <2e-16 ***
aw = 0.945-aw = 0.997 -77.333  -80.6014  -74.0653 <2e-16 ***
aw = 0.922-aw = 0.997 -90.333  -93.6014  -87.0653 <2e-16 ***
```

```
---
Signif. codes:  0 '***' 0.001 '**' 0.01 '*' 0.05 '.' 0.1 ' ' 1
[1] ""
[1] "#####"
[1] "#####"
[1] ""
```

# Substrate

[1] "SZMC26543"

Figure S15. Substrate – SZMC26543

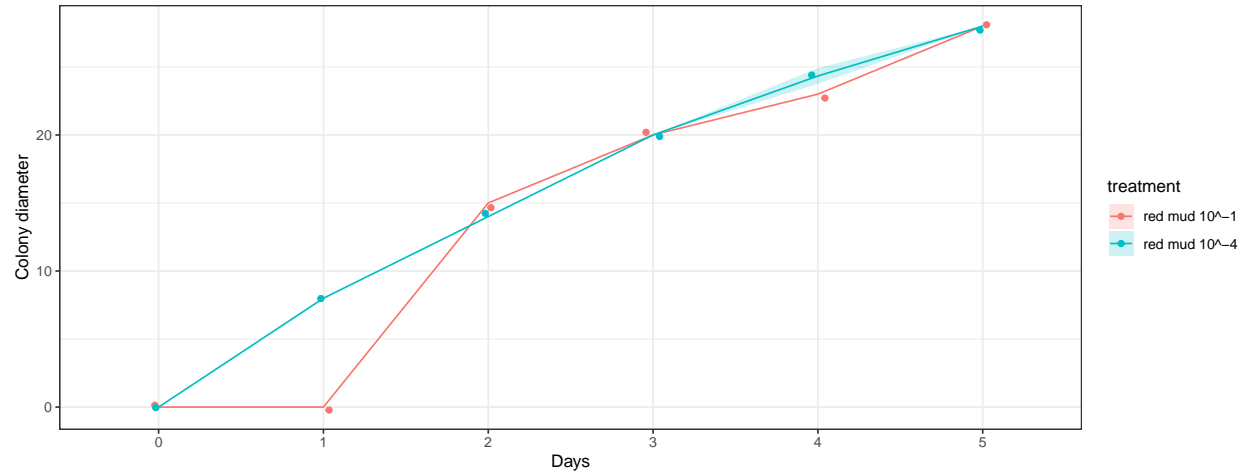

[1] "ANOVA results:"

|                         | Df | Sum Sq | Mean Sq | F value | Pr(>F)      |
|-------------------------|----|--------|---------|---------|-------------|
| data_stat_id\$treatment | 1  | 104.2  | 104.2   | 625     | 1.5e-05 *** |
| Residuals               | 4  | 0.7    | 0.2     |         |             |

---

Signif. codes: 0 '\*\*\*' 0.001 '\*\*' 0.01 '\*' 0.05 '.' 0.1 ' ' 1

[1] ""

[1] "#####"

[1] ""

[1] "Dunnett-teszt results:"

Dunnett's test for comparing several treatments with a control :  
95% family-wise confidence level

\$'red mud 10<sup>-1</sup>'

|                                                    | diff   | lwr.ci | upr.ci | pval        |
|----------------------------------------------------|--------|--------|--------|-------------|
| red mud 10 <sup>-4</sup> -red mud 10 <sup>-1</sup> | 8.3333 | 7.4079 | 9.2588 | 1.5e-05 *** |

---

Signif. codes: 0 '\*\*\*' 0.001 '\*\*' 0.01 '\*' 0.05 '.' 0.1 ' ' 1

[1] ""

[1] "#####"

[1] "#####"

[1] ""

[1] "T398A"



Figure S16. Substrate – T398A

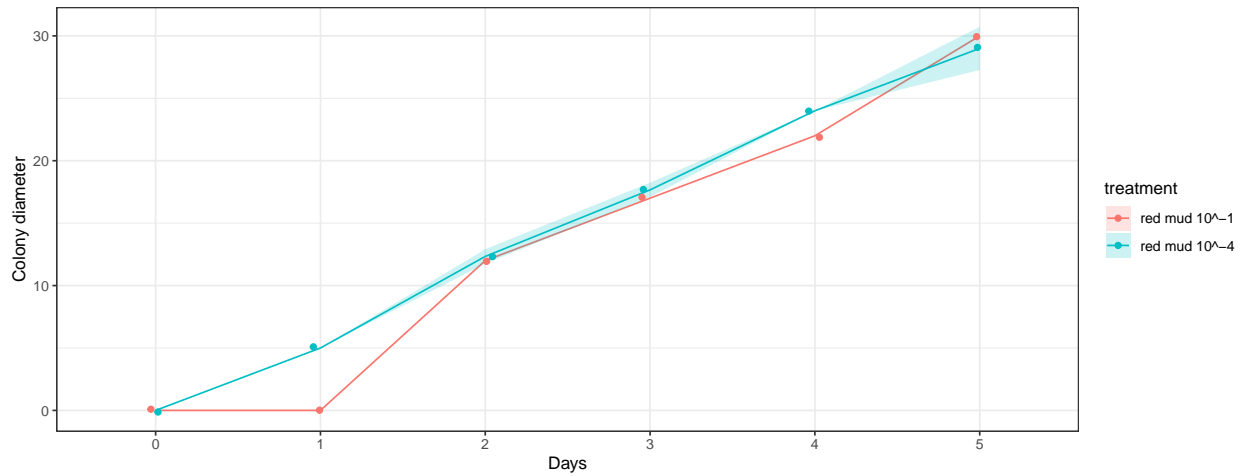

```
[1] "ANOVA results:"
```

|                         | Df | Sum Sq | Mean Sq | F value | Pr(>F) |
|-------------------------|----|--------|---------|---------|--------|
| data_stat_id\$treatment | 1  | 73.5   | 73.5    | 21      | 0.01 * |
| Residuals               | 4  | 14.0   | 3.5     |         |        |

```
---
```

```
Signif. codes:  0 '***' 0.001 '**' 0.01 '*' 0.05 '.' 0.1 ' ' 1
```

```
[1] ""
```

```
[1] "#####"
```

```
[1] ""
```

```
[1] "Dunnett-teszt results:"
```

```
Dunnett's test for comparing several treatments with a control :
95% family-wise confidence level
```

```
$'red mud 10^-1'
```

|                                                    | diff | lwr.ci | upr.ci | pval     |
|----------------------------------------------------|------|--------|--------|----------|
| red mud 10 <sup>-4</sup> -red mud 10 <sup>-1</sup> | 7    | 2.7589 | 11.241 | 0.0102 * |

```
---
```

```
Signif. codes:  0 '***' 0.001 '**' 0.01 '*' 0.05 '.' 0.1 ' ' 1
```

```
[1] ""
```

```
[1] "#####"
```

```
[1] "#####"
```

```
[1] ""
```

```
[1] "T398B"
```

Figure S17. Substrate – T398B

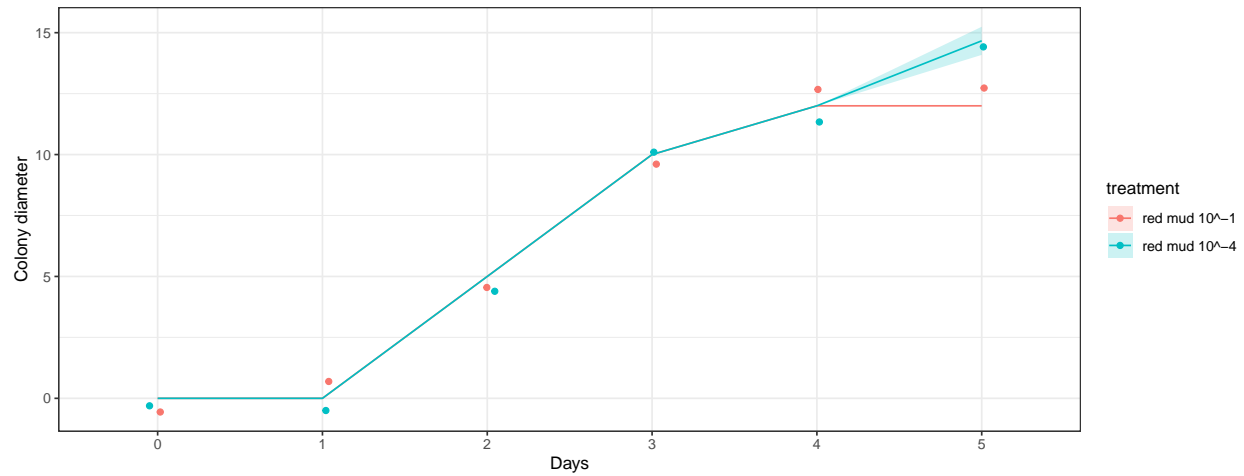

[1] "ANOVA results:"

|                         | Df | Sum Sq | Mean Sq | F value | Pr(>F)    |
|-------------------------|----|--------|---------|---------|-----------|
| data_stat_id\$treatment | 1  | 10.67  | 10.67   | 64      | 0.0013 ** |
| Residuals               | 4  | 0.67   | 0.17    |         |           |

---

Signif. codes: 0 '\*\*\*' 0.001 '\*\*' 0.01 '\*' 0.05 '.' 0.1 ' ' 1

[1] ""

[1] "#####"

[1] ""

[1] "Dunnett-teszt results:"

Dunnett's test for comparing several treatments with a control :  
95% family-wise confidence level

\$'red mud 10<sup>-1</sup>'

|                                                    | diff   | lwr.ci | upr.ci | pval      |
|----------------------------------------------------|--------|--------|--------|-----------|
| red mud 10 <sup>-4</sup> -red mud 10 <sup>-1</sup> | 2.6667 | 1.7412 | 3.5921 | 0.0013 ** |

---

Signif. codes: 0 '\*\*\*' 0.001 '\*\*' 0.01 '\*' 0.05 '.' 0.1 ' ' 1

[1] ""

[1] "#####"

[1] "#####"

[1] ""

[1] "T399"

Figure S18. Substrate – T399

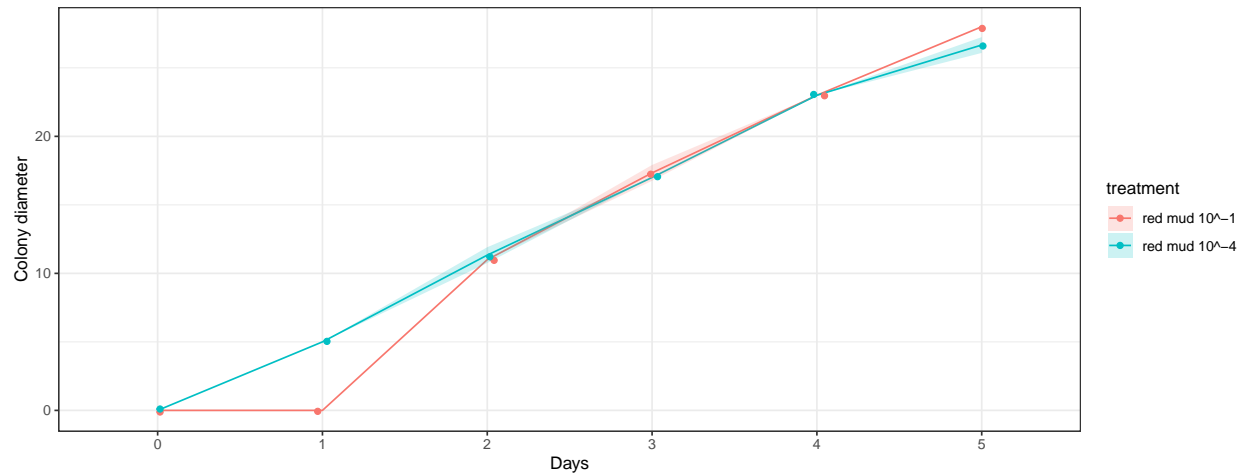

```
[1] "ANOVA results:"
              Df Sum Sq Mean Sq F value    Pr(>F)
data_stat_id$treatment  1  20.17    20.17    121 0.00039 ***
Residuals              4   0.67     0.17
---
Signif. codes:  0 '***' 0.001 '**' 0.01 '*' 0.05 '.' 0.1 ' ' 1
[1] ""
[1] "#####"
[1] ""
[1] "Dunnett-teszt results:"
```

Dunnett's test for comparing several treatments with a control :  
95% family-wise confidence level

```
$'red mud 10^-1'
              diff lwr.ci upr.ci    pval
red mud 10^-4-red mud 10^-1 3.6667 2.7412 4.5921 0.00039 ***
```

```
---
Signif. codes:  0 '***' 0.001 '**' 0.01 '*' 0.05 '.' 0.1 ' ' 1
```

```
[1] ""
[1] "#####"
[1] "#####"
[1] ""
[1] "T401A"
```

Figure S19. Substrate – T401A

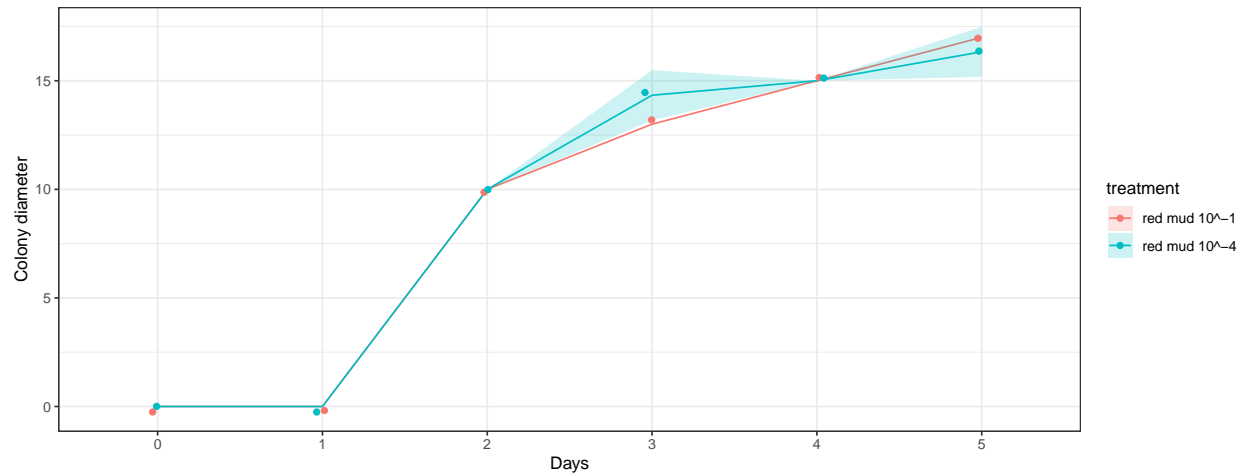

```
[1] "ANOVA results:"
```

```

              Df Sum Sq Mean Sq F value Pr(>F)
data_stat_id$treatment  1  0.667    0.667      1  0.37
Residuals              4  2.667    0.667

```

```
[1] ""
```

```
[1] "#####"
```

```
[1] ""
```

```
[1] "Dunnett-teszt results:"
```

Dunnett's test for comparing several treatments with a control :  
95% family-wise confidence level

```
$'red mud 10^-1'
```

```

              diff   lwr.ci upr.ci   pval
red mud 10^-4-red mud 10^-1 0.66667 -1.1843 2.5176 0.3739

```

```
---
```

```
Signif. codes:  0 '***' 0.001 '**' 0.01 '*' 0.05 '.' 0.1 ' ' 1
```

```
[1] ""
```

```
[1] "#####"
```

```
[1] "#####"
```

```
[1] ""
```

```
[1] "T401B"
```

Figure S20. Substrate – T401B

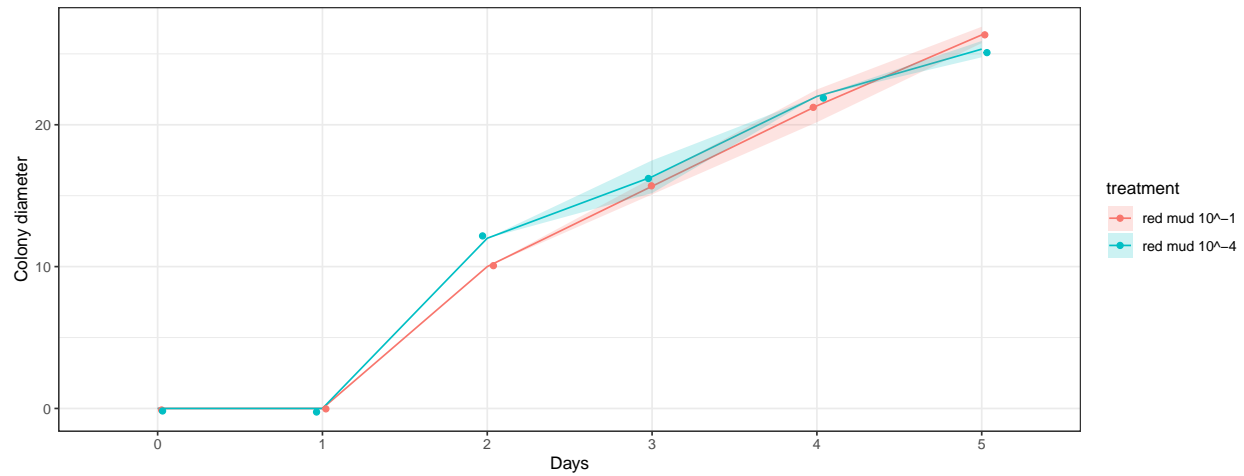

```
[1] "ANOVA results:"
```

|                         | Df | Sum Sq | Mean Sq | F value | Pr(>F) |
|-------------------------|----|--------|---------|---------|--------|
| data_stat_id\$treatment | 1  | 8.17   | 8.17    | 3.5     | 0.13   |
| Residuals               | 4  | 9.33   | 2.33    |         |        |

```
[1] ""
```

```
[1] "#####"
```

```
[1] ""
```

```
[1] "Dunnett-teszt results:"
```

Dunnett's test for comparing several treatments with a control :  
95% family-wise confidence level

```
$'red mud 10^-1'
```

|                                                    | diff   | lwr.ci  | upr.ci | pval   |
|----------------------------------------------------|--------|---------|--------|--------|
| red mud 10 <sup>-4</sup> -red mud 10 <sup>-1</sup> | 2.3333 | -1.1295 | 5.7962 | 0.1347 |

```
---
```

```
Signif. codes:  0 '***' 0.001 '**' 0.01 '*' 0.05 '.' 0.1 ' ' 1
```

```
[1] ""
```

```
[1] "#####"
```

```
[1] "#####"
```

```
[1] ""
```

```
[1] "TD12"
```

Figure S21. Substrate – TD12

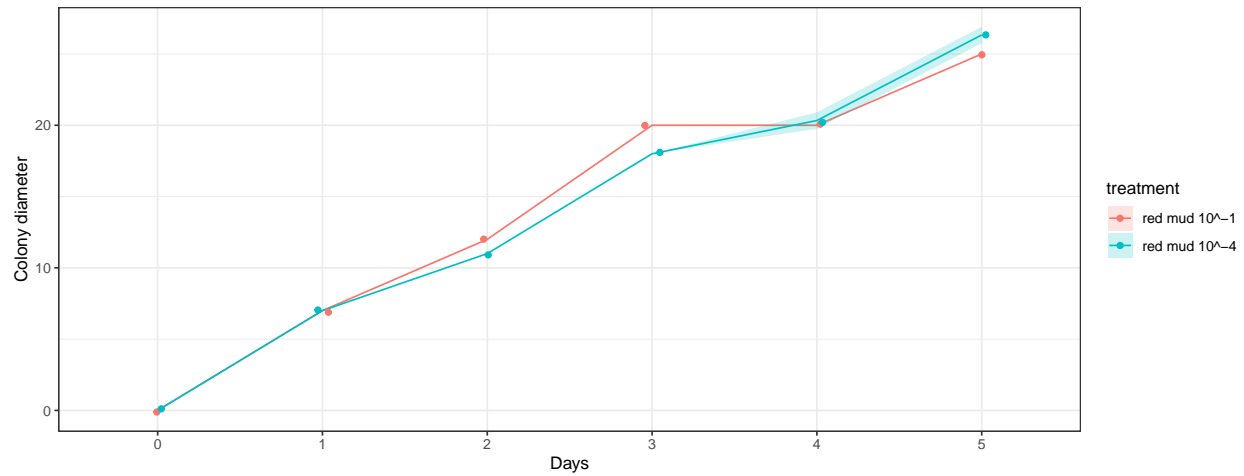

```
[1] "ANOVA results:"
```

|                         | Df | Sum Sq | Mean Sq | F value | Pr(>F) |
|-------------------------|----|--------|---------|---------|--------|
| data_stat_id\$treatment | 1  | 2.67   | 2.667   | 4       | 0.12   |
| Residuals               | 4  | 2.67   | 0.667   |         |        |

```
[1] ""
```

```
[1] "#####"
```

```
[1] ""
```

```
[1] "Dunnett-teszt results:"
```

Dunnett's test for comparing several treatments with a control :  
95% family-wise confidence level

```
$'red mud 10^-1'
```

|                                                    | diff    | lwr.ci  | upr.ci  | pval   |
|----------------------------------------------------|---------|---------|---------|--------|
| red mud 10 <sup>-4</sup> -red mud 10 <sup>-1</sup> | -1.3333 | -3.1843 | 0.51763 | 0.1161 |

```
---
```

```
Signif. codes:  0 '***' 0.001 '**' 0.01 '*' 0.05 '.' 0.1 ' ' 1
```

```
[1] ""
```

```
[1] "#####"
```

```
[1] "#####"
```

```
[1] ""
```

```
[1] "TD16"
```

Figure S22. Substrate – TD16

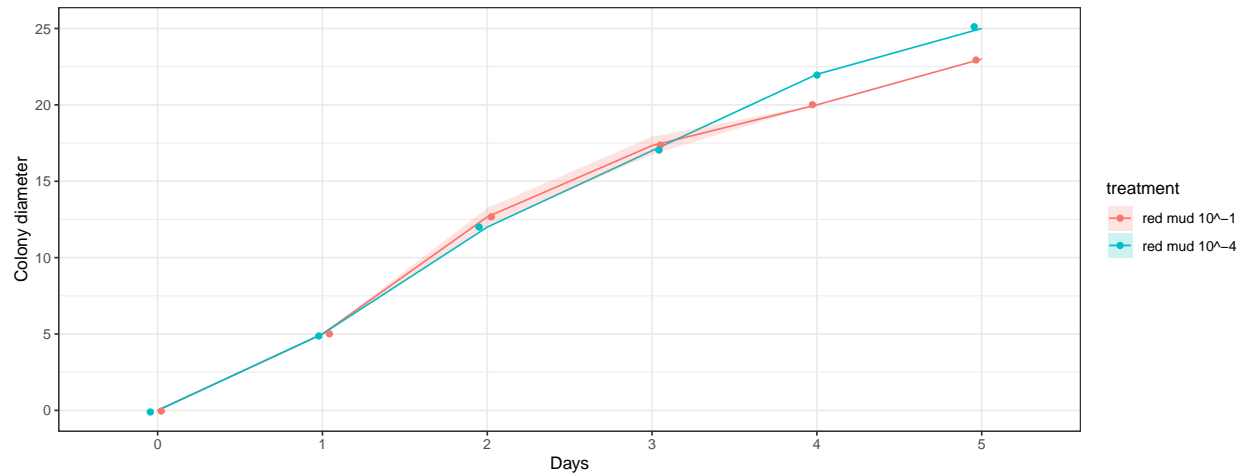

```
[1] "ANOVA results:"
              Df Sum Sq Mean Sq F value Pr(>F)
data_stat_id$treatment  1   13.5    13.5 4.5e+28 <2e-16 ***
Residuals                4    0.0     0.0
---
Signif. codes:  0 '***' 0.001 '**' 0.01 '*' 0.05 '.' 0.1 ' ' 1
[1] ""
[1] "#####"
[1] ""
[1] "Dunnett-teszt results:"

Dunnett's test for comparing several treatments with a control :
95% family-wise confidence level

$`red mud 10^-1`
              diff lwr.ci upr.ci    pval
red mud 10^-4-red mud 10^-1      3      3      3 <2e-16 ***
---
Signif. codes:  0 '***' 0.001 '**' 0.01 '*' 0.05 '.' 0.1 ' ' 1

[1] ""
[1] "#####"
[1] "#####"
[1] ""
[1] "TD22"
```

Figure S23. Substrate – TD22

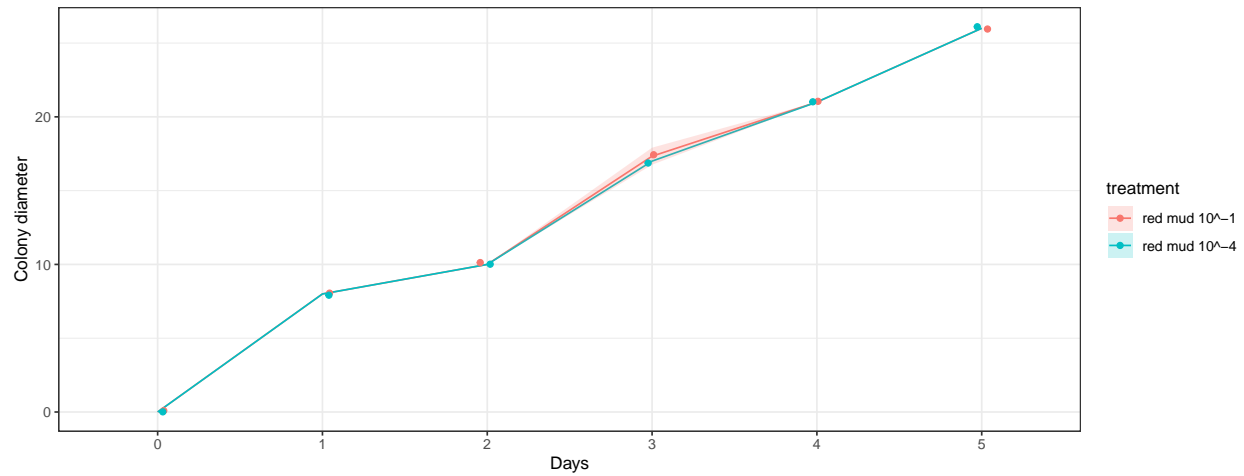

```
[1] "ANOVA results:"
```

|                         | Df | Sum Sq | Mean Sq | F value | Pr(>F) |
|-------------------------|----|--------|---------|---------|--------|
| data_stat_id\$treatment | 1  | 0.167  | 0.167   | 1       | 0.37   |
| Residuals               | 4  | 0.667  | 0.167   |         |        |

```
[1] ""
```

```
[1] "#####"
```

```
[1] ""
```

```
[1] "Dunnett-teszt results:"
```

Dunnett's test for comparing several treatments with a control :  
95% family-wise confidence level

```
$'red mud 10^-1'
```

|                                                    | diff     | lwr.ci  | upr.ci  | pval   |
|----------------------------------------------------|----------|---------|---------|--------|
| red mud 10 <sup>-4</sup> -red mud 10 <sup>-1</sup> | -0.33333 | -1.2588 | 0.59215 | 0.3739 |

```
---
```

```
Signif. codes:  0 '***' 0.001 '**' 0.01 '*' 0.05 '.' 0.1 ' ' 1
```

```
[1] ""
```

```
[1] "#####"
```

```
[1] "#####"
```

```
[1] ""
```

```
[1] "TD25"
```



Figure S24. Substrate – TD25

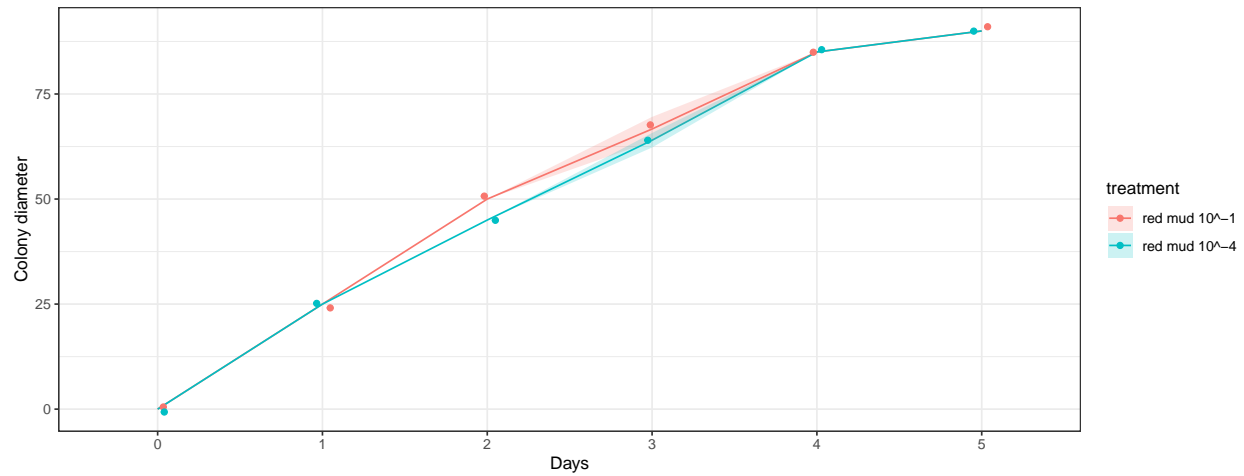

```
[1] "ANOVA results:"
```

|                         | Df | Sum Sq | Mean Sq | F value | Pr(>F)  |
|-------------------------|----|--------|---------|---------|---------|
| data_stat_id\$treatment | 1  | 88.2   | 88.2    | 15.6    | 0.017 * |
| Residuals               | 4  | 22.7   | 5.7     |         |         |

```
---
```

```
Signif. codes:  0 '***' 0.001 '**' 0.01 '*' 0.05 '.' 0.1 ' ' 1
```

```
[1] ""
```

```
[1] "#####"
```

```
[1] ""
```

```
[1] "Dunnett-teszt results:"
```

```
Dunnett's test for comparing several treatments with a control :
95% family-wise confidence level
```

```
$'red mud 10^-1'
```

|                                                    | diff    | lwr.ci  | upr.ci  | pval     |
|----------------------------------------------------|---------|---------|---------|----------|
| red mud 10 <sup>-4</sup> -red mud 10 <sup>-1</sup> | -7.6667 | -13.063 | -2.2702 | 0.0169 * |

```
---
```

```
Signif. codes:  0 '***' 0.001 '**' 0.01 '*' 0.05 '.' 0.1 ' ' 1
```

```
[1] ""
```

```
[1] "#####"
```

```
[1] "#####"
```

```
[1] ""
```

```
[1] "TD4"
```

Figure S25. Substrate – TD4

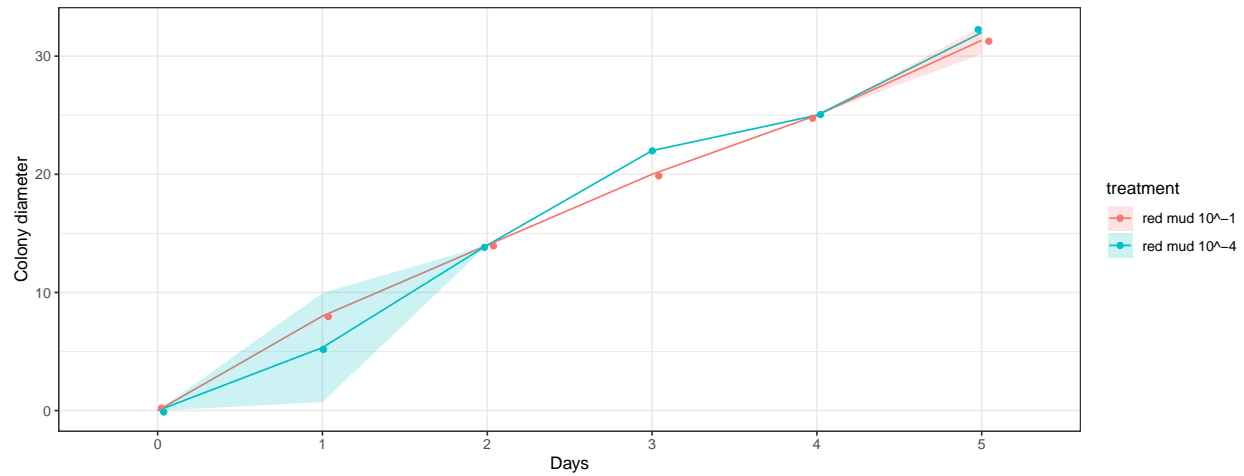

[1] "ANOVA results:"

|                         | Df | Sum Sq | Mean Sq | F value | Pr(>F) |
|-------------------------|----|--------|---------|---------|--------|
| data_stat_id\$treatment | 1  | 0.0    | 0.0     | 0       | 1      |
| Residuals               | 4  | 45.3   | 11.3    |         |        |

[1] ""

[1] "#####"

[1] ""

[1] "Dunnett-teszt results:"

Dunnett's test for comparing several treatments with a control :  
95% family-wise confidence level

\$'red mud 10<sup>-1</sup>'

|                                                    | diff | lwr.ci  | upr.ci | pval   |
|----------------------------------------------------|------|---------|--------|--------|
| red mud 10 <sup>-4</sup> -red mud 10 <sup>-1</sup> | 0    | -7.6317 | 7.6317 | 1.0000 |

---

Signif. codes: 0 '\*\*\*' 0.001 '\*\*' 0.01 '\*' 0.05 '.' 0.1 ' ' 1

[1] ""

[1] "#####"

[1] "#####"

[1] ""

[1] "TD5"

Figure S26. Substrate – TD5

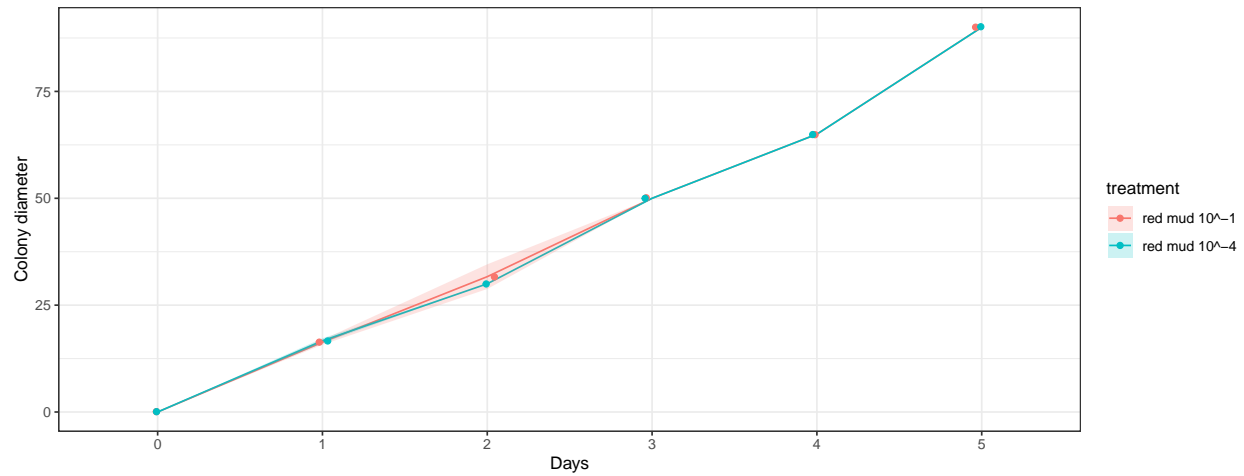

```
[1] "ANOVA results:"
```

|                         | Df | Sum Sq | Mean Sq | F value | Pr(>F) |
|-------------------------|----|--------|---------|---------|--------|
| data_stat_id\$treatment | 1  | 2.67   | 2.67    | 0.73    | 0.44   |
| Residuals               | 4  | 14.67  | 3.67    |         |        |

```
[1] ""
```

```
[1] "#####"
```

```
[1] ""
```

```
[1] "Dunnett-teszt results:"
```

Dunnett's test for comparing several treatments with a control :  
95% family-wise confidence level

```
$'red mud 10^-1'
```

|                                                    | diff    | lwr.ci  | upr.ci | pval   |
|----------------------------------------------------|---------|---------|--------|--------|
| red mud 10 <sup>-4</sup> -red mud 10 <sup>-1</sup> | -1.3333 | -5.6742 | 3.0076 | 0.4418 |

```
---
```

```
Signif. codes:  0 '***' 0.001 '**' 0.01 '*' 0.05 '.' 0.1 ' ' 1
```

```
[1] ""
```

```
[1] "#####"
```

```
[1] "#####"
```

```
[1] ""
```

```
[1] "TD6"
```

Figure S27. Substrate – TD6

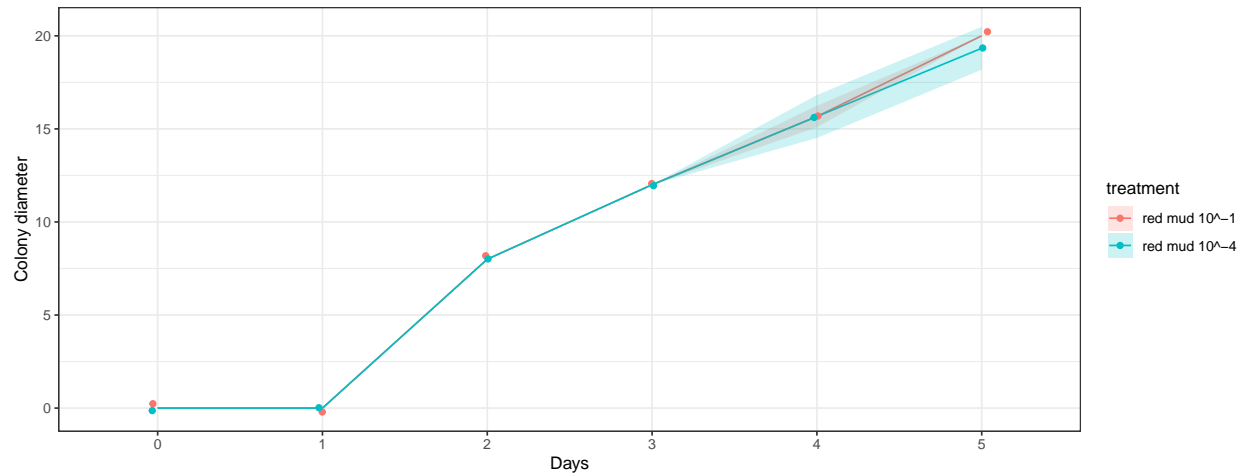

```
[1] "ANOVA results:"
```

|                         | Df | Sum Sq | Mean Sq | F value | Pr(>F) |
|-------------------------|----|--------|---------|---------|--------|
| data_stat_id\$treatment | 1  | 0.667  | 0.667   | 4       | 0.12   |
| Residuals               | 4  | 0.667  | 0.167   |         |        |

```
[1] ""
```

```
[1] "#####"
```

```
[1] ""
```

```
[1] "Dunnett-teszt results:"
```

Dunnett's test for comparing several treatments with a control :  
95% family-wise confidence level

```
$'red mud 10^-1'
```

|                                                    | diff     | lwr.ci  | upr.ci  | pval   |
|----------------------------------------------------|----------|---------|---------|--------|
| red mud 10 <sup>-4</sup> -red mud 10 <sup>-1</sup> | -0.66667 | -1.5921 | 0.25882 | 0.1161 |

```
---
```

```
Signif. codes:  0 '***' 0.001 '**' 0.01 '*' 0.05 '.' 0.1 ' ' 1
```

```
[1] ""
```

```
[1] "#####"
```

```
[1] "#####"
```

```
[1] ""
```

```
[1] "TD8"
```

Figure S28. Substrate – TD8

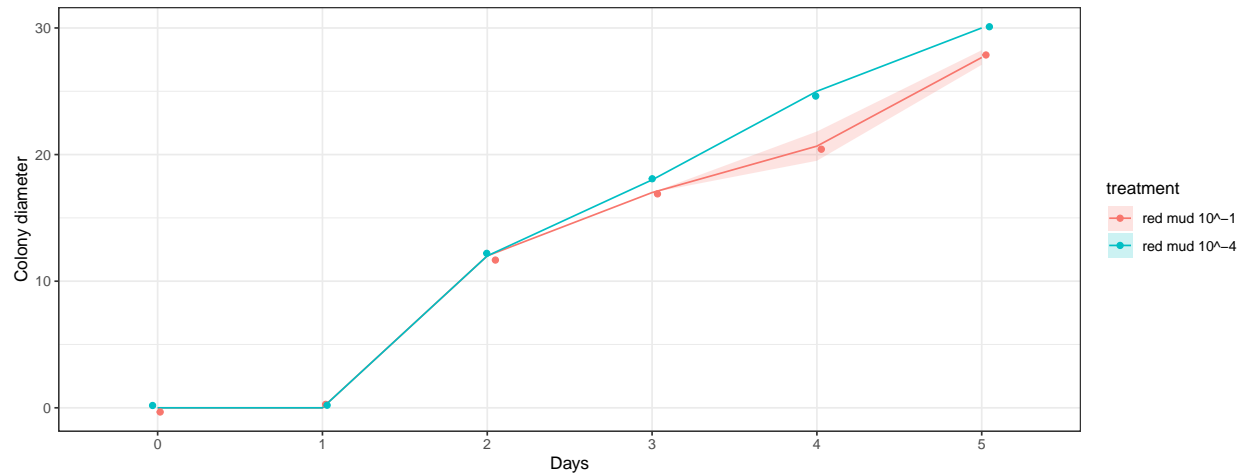

```
[1] "ANOVA results:"
```

|                         | Df | Sum Sq | Mean Sq | F value | Pr(>F)      |
|-------------------------|----|--------|---------|---------|-------------|
| data_stat_id\$treatment | 1  | 88.2   | 88.2    | 75.6    | 0.00096 *** |
| Residuals               | 4  | 4.7    | 1.2     |         |             |

```
---
```

```
Signif. codes:  0 '***' 0.001 '**' 0.01 '*' 0.05 '.' 0.1 ' ' 1
```

```
[1] ""
```

```
[1] "#####"
```

```
[1] ""
```

```
[1] "Dunnett-teszt results:"
```

```
Dunnett's test for comparing several treatments with a control :
95% family-wise confidence level
```

```
$'red mud 10^-1'
```

|                                                    | diff   | lwr.ci | upr.ci | pval        |
|----------------------------------------------------|--------|--------|--------|-------------|
| red mud 10 <sup>-4</sup> -red mud 10 <sup>-1</sup> | 7.6667 | 5.2181 | 10.115 | 0.00096 *** |

```
---
```

```
Signif. codes:  0 '***' 0.001 '**' 0.01 '*' 0.05 '.' 0.1 ' ' 1
```

```
[1] ""
```

```
[1] "#####"
```

```
[1] "#####"
```

```
[1] ""
```

```
[1] "TD9"
```

Figure S29. Substrate – TD9

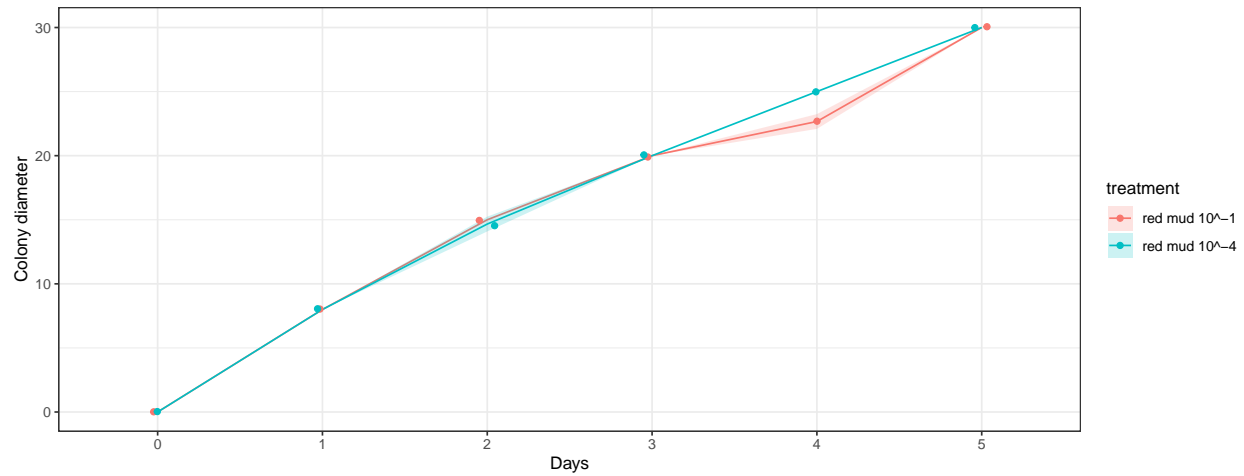

```
[1] "ANOVA results:"
```

|                         | Df | Sum Sq | Mean Sq | F value | Pr(>F)  |
|-------------------------|----|--------|---------|---------|---------|
| data_stat_id\$treatment | 1  | 6.00   | 6.00    | 18      | 0.013 * |
| Residuals               | 4  | 1.33   | 0.33    |         |         |

```
---
```

```
Signif. codes:  0 '***' 0.001 '**' 0.01 '*' 0.05 '.' 0.1 ' ' 1
```

```
[1] ""
```

```
[1] "#####"
```

```
[1] ""
```

```
[1] "Dunnett-teszt results:"
```

```
Dunnett's test for comparing several treatments with a control :
95% family-wise confidence level
```

```
$'red mud 10^-1'
```

|                                                    | diff | lwr.ci  | upr.ci | pval     |
|----------------------------------------------------|------|---------|--------|----------|
| red mud 10 <sup>-4</sup> -red mud 10 <sup>-1</sup> | 2    | 0.69117 | 3.3088 | 0.0132 * |

```
---
```

```
Signif. codes:  0 '***' 0.001 '**' 0.01 '*' 0.05 '.' 0.1 ' ' 1
```

```
[1] ""
```

```
[1] "#####"
```

```
[1] "#####"
```

```
[1] ""
```

# pH

[1] "T398A"

Figure S30. pH – T398A

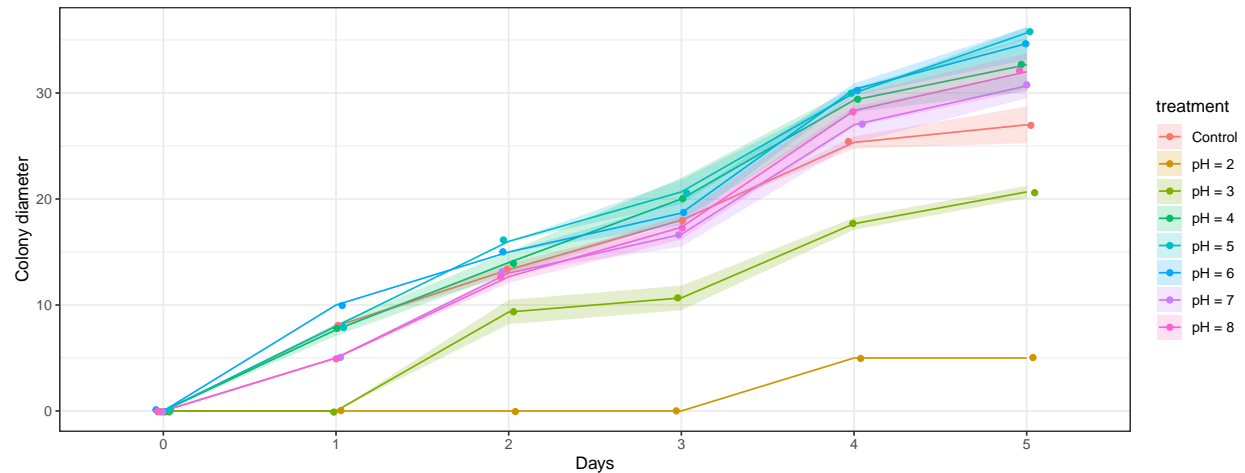

[1] "ANOVA results:"

|                         | Df | Sum Sq | Mean Sq | F value | Pr(>F)      |
|-------------------------|----|--------|---------|---------|-------------|
| data_stat_id\$treatment | 7  | 9521   | 1360    | 172     | 1.7e-12 *** |
| Residuals               | 14 | 111    | 8       |         |             |

---

Signif. codes: 0 '\*\*\*' 0.001 '\*\*' 0.01 '\*' 0.05 '.' 0.1 ' ' 1

[1] ""

[1] "#####"

[1] ""

[1] "Dunnett-test results:"

Dunnett's test for comparing several treatments with a control :  
95% family-wise confidence level

|                | diff      | lwr.ci   | upr.ci   | pval        |
|----------------|-----------|----------|----------|-------------|
| pH = 2-Control | -61.66667 | -71.3745 | -51.9588 | 6.2e-15 *** |
| pH = 3-Control | -33.33333 | -40.1978 | -26.4688 | 1.1e-11 *** |
| pH = 4-Control | 12.00000  | 5.1355   | 18.8645  | 0.00075 *** |
| pH = 5-Control | 18.66667  | 11.8022  | 25.5312  | 5.3e-06 *** |
| pH = 6-Control | 17.00000  | 10.1355  | 23.8645  | 1.4e-05 *** |
| pH = 7-Control | 0.66667   | -6.1978  | 7.5312   | 0.99983     |
| pH = 8-Control | 3.66667   | -3.1978  | 10.5312  | 0.48647     |

---

Signif. codes: 0 '\*\*\*' 0.001 '\*\*' 0.01 '\*' 0.05 '.' 0.1 ' ' 1

[1] ""

[1] "#####"

[1] "#####"

[1] ""

[1] "T398B"

Figure S31. pH – T398B

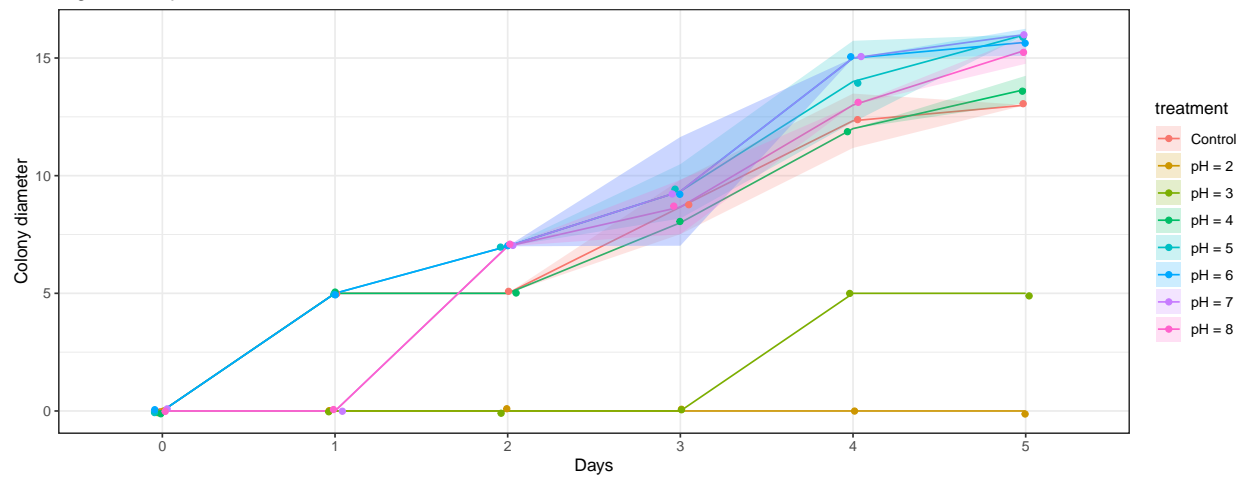

```
[1] "ANOVA results:"
              Df Sum Sq Mean Sq F value    Pr(>F)
data_stat_id$treatment  7    5415      774      246 1.5e-13 ***
Residuals              14      44        3

---
Signif. codes:  0 '***' 0.001 '**' 0.01 '*' 0.05 '.' 0.1 ' ' 1
[1] ""
[1] "#####"
[1] ""
[1] "Dunnett-test results:"
```

Dunnett's test for comparing several treatments with a control :  
95% family-wise confidence level

```
$Control
      diff    lwr.ci    upr.ci    pval
pH = 2-Control -44.00000 -50.12127 -37.8787 2.3e-15 ***
pH = 3-Control -34.00000 -38.32839 -29.6716 < 2e-16 ***
pH = 4-Control  -0.33333  -4.66173   3.9951 0.99996
pH = 5-Control   7.33333   3.00494  11.6617 0.00099 ***
pH = 6-Control   8.00000   3.67161  12.3284 0.00037 ***
pH = 7-Control   3.33333  -0.99506   7.6617 0.16953
pH = 8-Control   0.00000  -4.32839   4.3284 1.00000
```

```
---
Signif. codes:  0 '***' 0.001 '**' 0.01 '*' 0.05 '.' 0.1 ' ' 1

[1] ""
[1] "#####"
[1] "#####"
[1] ""
[1] "T399"
```



Figure S32. pH – T399

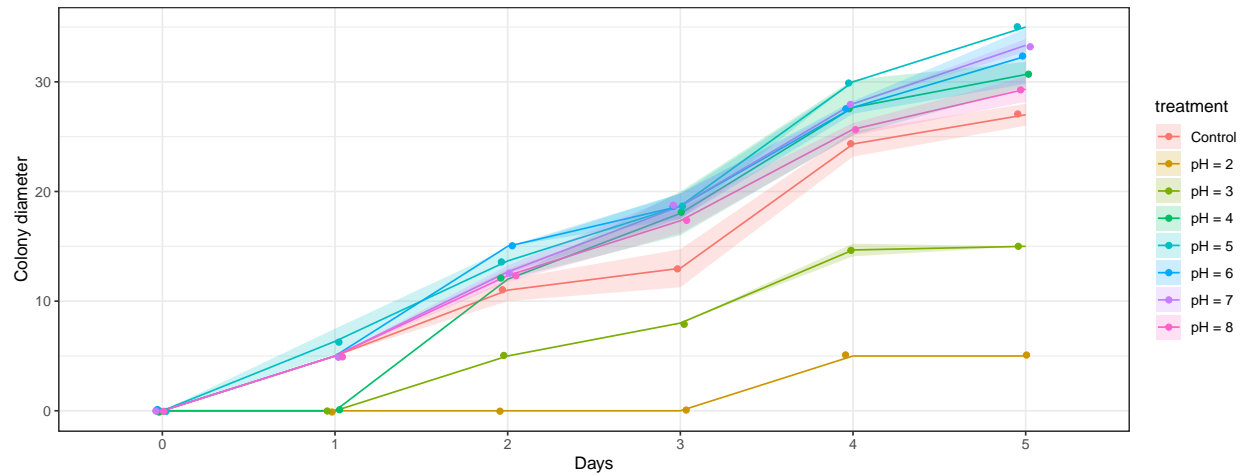

```
[1] "ANOVA results:"
              Df Sum Sq Mean Sq F value    Pr(>F)
data_stat_id$treatment  7  10590      1513      284 5.5e-14 ***
Residuals              14     75         5
---
Signif. codes:  0 '***' 0.001 '**' 0.01 '*' 0.05 '.' 0.1 ' ' 1
[1] ""
[1] "#####"
[1] ""
[1] "Dunnett-test results:"

Dunnett's test for comparing several treatments with a control :
95% family-wise confidence level

$Control
      diff   lwr.ci  upr.ci    pval
pH = 2-Control -50.3333 -58.3074 -42.359 < 2e-16 ***
pH = 3-Control -37.6667 -43.3052 -32.028 2.2e-16 ***
pH = 4-Control   8.0000   2.3615  13.639 0.0046 **
pH = 5-Control  23.3333  17.6948  28.972 1.3e-09 ***
pH = 6-Control  18.3333  12.6948  23.972 3.3e-07 ***
pH = 7-Control  17.3333  11.6948  22.972 1.0e-06 ***
pH = 8-Control   9.3333   3.6948  14.972 0.0013 **
---
Signif. codes:  0 '***' 0.001 '**' 0.01 '*' 0.05 '.' 0.1 ' ' 1

[1] ""
[1] "#####"
[1] "#####"
[1] ""
[1] "T401A"
```

Figure S33. pH – T401A

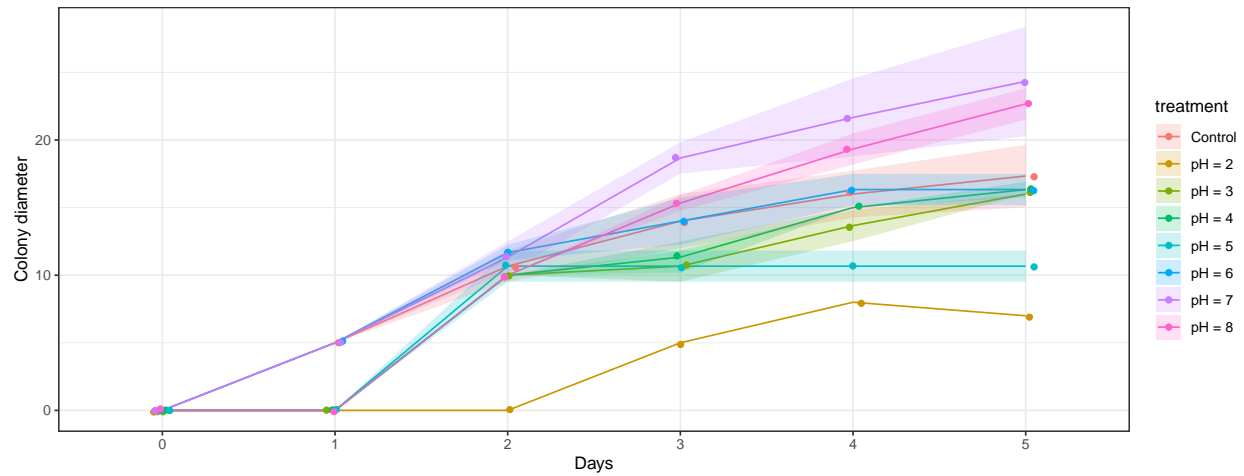

```
[1] "ANOVA results:"
              Df Sum Sq Mean Sq F value Pr(>F)
data_stat_id$treatment  7   2888     413   53.8 4.7e-09 ***
Residuals              14    107       8

---
Signif. codes:  0 '***' 0.001 '**' 0.01 '*' 0.05 '.' 0.1 ' ' 1

[1] ""
[1] "#####"
[1] ""
[1] "Dunnett-test results:"

Dunnett's test for comparing several treatments with a control :
95% family-wise confidence level
```

```
$Control
      diff   lwr.ci   upr.ci    pval
pH = 2-Control -3.00000 -12.561   6.5605  0.8905
pH = 3-Control -12.66667 -19.427  -5.9063  0.0004 ***
pH = 4-Control -10.33333 -17.094  -3.5730  0.0024 **
pH = 5-Control -20.33333 -27.094 -13.5730 4.6e-07 ***
pH = 6-Control  0.33333  -6.427   7.0937  1.0000
pH = 7-Control  18.00000  11.240  24.7603 1.0e-05 ***
pH = 8-Control  4.33333  -2.427  11.0937  0.3128
```

```
---
Signif. codes:  0 '***' 0.001 '**' 0.01 '*' 0.05 '.' 0.1 ' ' 1

[1] ""
[1] "#####"
[1] "#####"
[1] ""
[1] "T401B"
```

Figure S34. pH – T401B

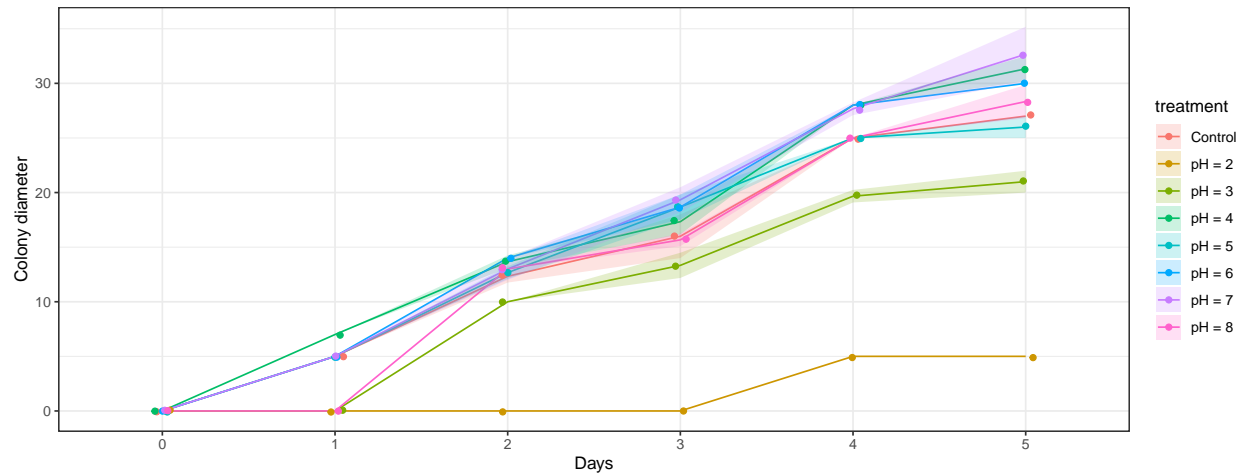

```
[1] "ANOVA results:"
              Df Sum Sq Mean Sq F value    Pr(>F)
data_stat_id$treatment  7   5664      809    221 3.1e-13 ***
Residuals              14     51        4

---
Signif. codes:  0 '***' 0.001 '**' 0.01 '*' 0.05 '.' 0.1 ' ' 1
[1] ""
[1] "#####"
[1] ""
[1] "Dunnett-test results:"

Dunnett's test for comparing several treatments with a control :
95% family-wise confidence level
```

```
$Control
      diff   lwr.ci   upr.ci    pval
pH = 2-Control -55.3333 -61.9451 -48.7216 < 2e-16 ***
pH = 3-Control -21.3333 -26.0085 -16.6581 1.4e-10 ***
pH = 4-Control  12.0000   7.3248  16.6752 2.1e-05 ***
pH = 5-Control   2.0000  -2.6752   6.6752 0.6928
pH = 6-Control  10.3333   5.6581  15.0085 6.1e-05 ***
pH = 7-Control  12.3333   7.6581  17.0085 7.6e-06 ***
pH = 8-Control  -3.3333  -8.0085   1.3419 0.2243
```

```
---
Signif. codes:  0 '***' 0.001 '**' 0.01 '*' 0.05 '.' 0.1 ' ' 1

[1] ""
[1] "#####"
[1] "#####"
[1] ""
[1] "TD12"
```

Figure S35. pH – TD12

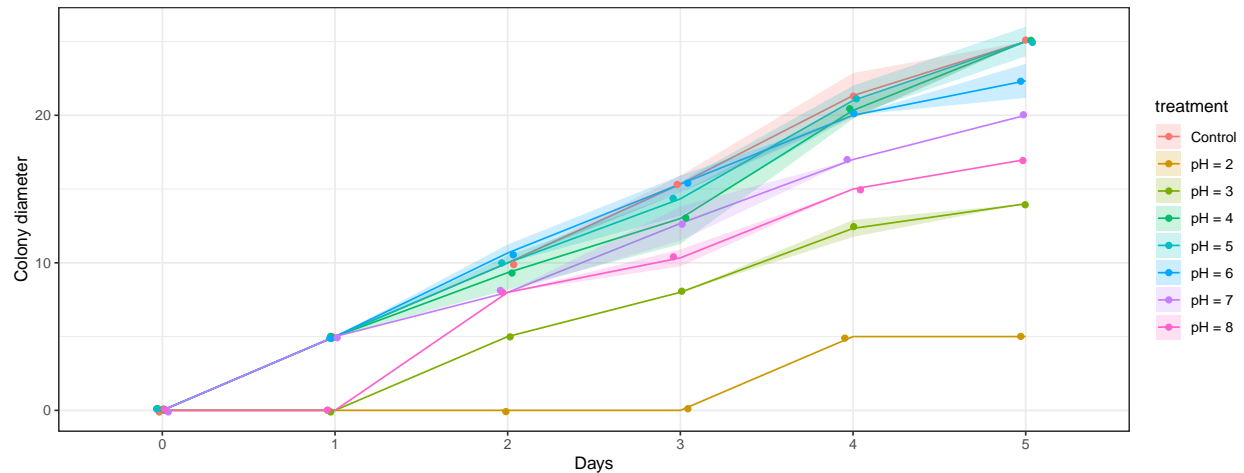

```
[1] "ANOVA results:"
              Df Sum Sq Mean Sq F value    Pr(>F)
data_stat_id$treatment  7   4867      695     340 1.6e-14 ***
Residuals              14     29        2
---
Signif. codes:  0 '***' 0.001 '**' 0.01 '*' 0.05 '.' 0.1 ' ' 1
[1] ""
[1] "#####"
[1] ""
[1] "Dunnett-test results:"

Dunnett's test for comparing several treatments with a control :
  95% family-wise confidence level
```

```
$Control
      diff   lwr.ci   upr.ci    pval
pH = 2-Control -46.6667 -51.6075 -41.72579 < 2e-16 ***
pH = 3-Control -37.3333 -40.8271 -33.83961 < 2e-16 ***
pH = 4-Control  -4.0000  -7.4937  -0.50627 0.0221 *
pH = 5-Control  -1.3333  -4.8271   2.16039 0.7807
pH = 6-Control  -3.3333  -6.8271   0.16039 0.0644 .
pH = 7-Control -14.0000 -17.4937 -10.50627 1.6e-08 ***
pH = 8-Control -26.3333 -29.8271 -22.83961 < 2e-16 ***
```

```
---
Signif. codes:  0 '***' 0.001 '**' 0.01 '*' 0.05 '.' 0.1 ' ' 1
[1] ""
[1] "#####"
[1] "#####"
[1] ""
[1] "TD16"
```

Figure S36. pH – TD16

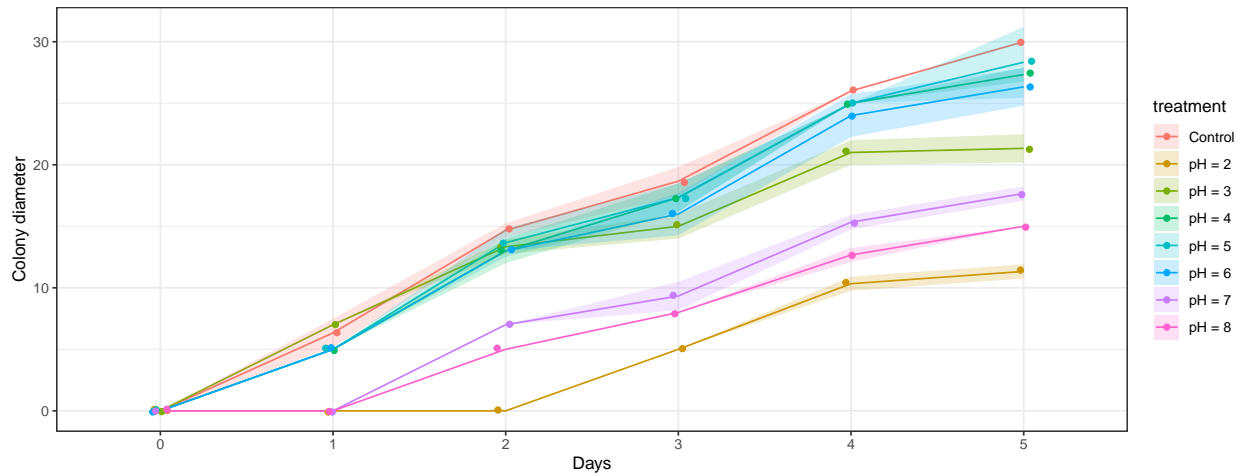

```
[1] "ANOVA results:"
              Df Sum Sq Mean Sq F value    Pr(>F)
data_stat_id$treatment  7   8199     1171      226 2.7e-13 ***
Residuals              14     73         5
---
Signif. codes:  0 '***' 0.001 '**' 0.01 '*' 0.05 '.' 0.1 ' ' 1
[1] ""
[1] "#####"
[1] ""
[1] "Dunnett-test results:"
```

Dunnett's test for comparing several treatments with a control :  
95% family-wise confidence level

```
$Control
      diff lwr.ci upr.ci  pval
pH = 2-Control -15.6667 -23.533 -7.80014 0.00020 ***
pH = 3-Control -18.0000 -23.562 -12.43753 2.3e-06 ***
pH = 4-Control  -8.0000 -13.562  -2.43753 0.00418 **
pH = 5-Control  -6.3333 -11.896  -0.77086 0.02299 *
pH = 6-Control -11.3333 -16.896  -5.77086 0.00018 ***
pH = 7-Control -46.3333 -51.896 -40.77086 < 2e-16 ***
pH = 8-Control -55.0000 -60.562 -49.43753 < 2e-16 ***
```

```
---
Signif. codes:  0 '***' 0.001 '**' 0.01 '*' 0.05 '.' 0.1 ' ' 1
[1] ""
[1] "#####"
[1] "#####"
[1] ""
[1] "TD22"
```

Figure S37. pH – TD22

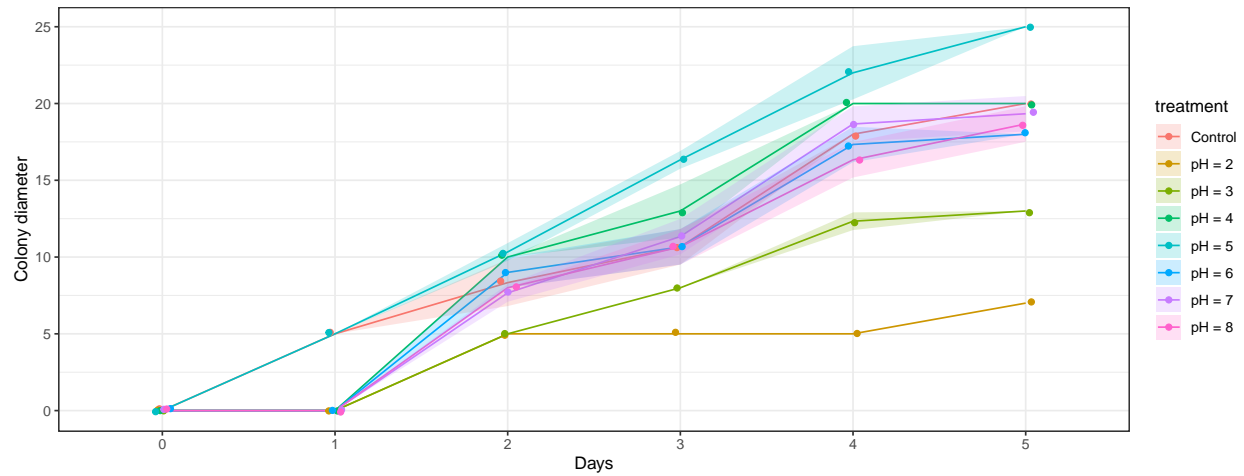

```
[1] "ANOVA results:"
              Df Sum Sq Mean Sq F value    Pr(>F)
data_stat_id$treatment  7   2707      387    129 1.3e-11 ***
Residuals              14     42        3

---
Signif. codes:  0 '***' 0.001 '**' 0.01 '*' 0.05 '.' 0.1 ' ' 1
[1] ""
[1] "#####"
[1] ""
[1] "Dunnett-test results:"
```

Dunnett's test for comparing several treatments with a control :  
95% family-wise confidence level

```
$Control
      diff   lwr.ci   upr.ci    pval
pH = 2-Control  4.0000  -1.9805   9.98053  0.2758
pH = 3-Control -23.6667 -27.8955 -19.43779 1.1e-12 ***
pH = 4-Control  1.0000  -3.2289   5.22888  0.9687
pH = 5-Control 16.6667  12.4378  20.89554 1.2e-09 ***
pH = 6-Control  -7.0000 -11.2289  -2.77112  0.0014 **
pH = 7-Control  -5.0000  -9.2289  -0.77112  0.0178 *
pH = 8-Control  -8.3333 -12.5622  -4.10446  0.0002 ***
```

```
---
Signif. codes:  0 '***' 0.001 '**' 0.01 '*' 0.05 '.' 0.1 ' ' 1

[1] ""
[1] "#####"
[1] "#####"
[1] ""
[1] "TD25"
```

Figure S38. pH – TD25

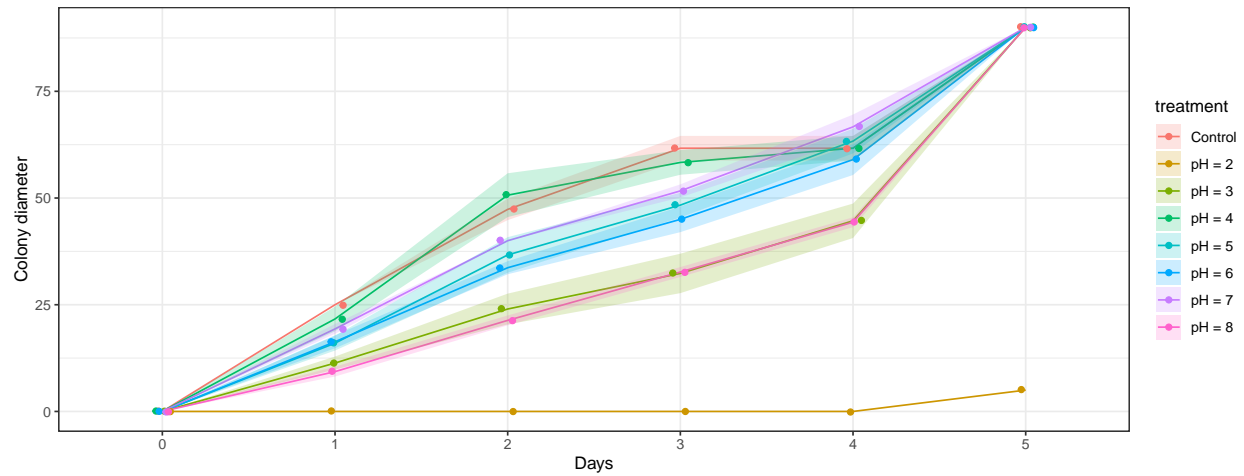

```
[1] "ANOVA results:"
              Df Sum Sq Mean Sq F value    Pr(>F)
data_stat_id$treatment  7  74671    10667      254 1.2e-13 ***
Residuals              14    588      42
---
Signif. codes:  0 '***' 0.001 '**' 0.01 '*' 0.05 '.' 0.1 ' ' 1
[1] ""
[1] "#####"
[1] ""
[1] "Dunnett-test results:"

Dunnett's test for comparing several treatments with a control :
  95% family-wise confidence level
```

```
$Control
      diff   lwr.ci   upr.ci    pval
pH = 2-Control -270.6667 -293.044 -248.290 < 2e-16 ***
pH = 3-Control  -83.3333  -99.156  -67.510 2.5e-13 ***
pH = 4-Control   -3.3333  -19.156   12.490 0.98251
pH = 5-Control  -31.3333  -47.156  -15.510 0.00024 ***
pH = 6-Control  -41.6667  -57.490  -25.844 8.2e-06 ***
pH = 7-Control  -18.0000  -33.823   -2.177 0.02330 *
pH = 8-Control  -88.0000 -103.823  -72.177 5.8e-15 ***
```

```
---
Signif. codes:  0 '***' 0.001 '**' 0.01 '*' 0.05 '.' 0.1 ' ' 1
```

```
[1] ""
[1] "#####"
[1] "#####"
[1] ""
[1] "TD4"
```

Figure S39. pH – TD4

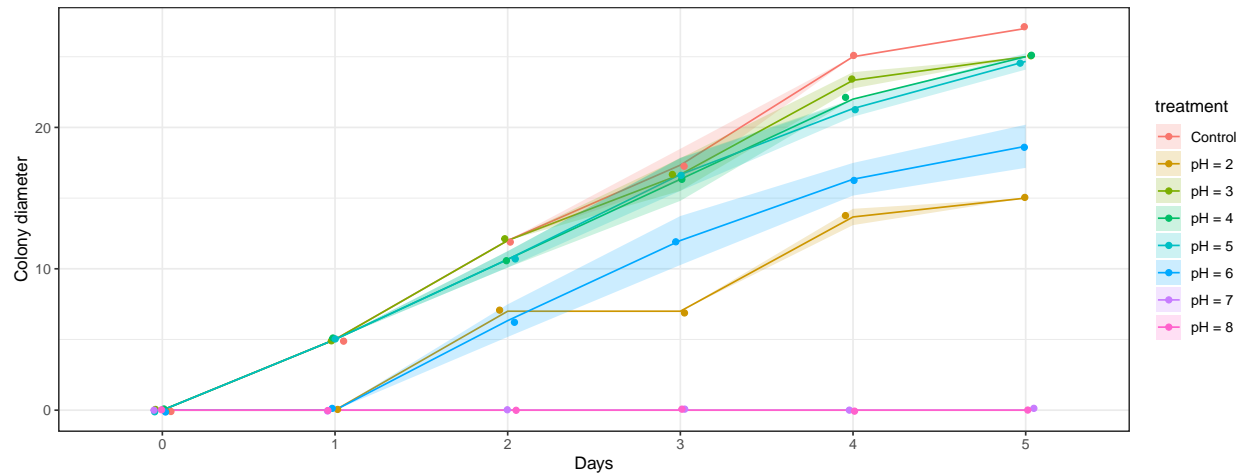

```
[1] "ANOVA results:"
              Df Sum Sq Mean Sq F value Pr(>F)
data_stat_id$treatment  7  31844    4549    2450 <2e-16 ***
Residuals              14    26      2
---
Signif. codes:  0 '***' 0.001 '**' 0.01 '*' 0.05 '.' 0.1 ' ' 1
[1] ""
[1] "#####"
[1] ""
[1] "Dunnett-test results:"
```

Dunnett's test for comparing several treatments with a control :  
95% family-wise confidence level

```
$Control
      diff   lwr.ci   upr.ci    pval
pH = 2-Control  41.6667  36.9612  46.3721 < 2e-16 ***
pH = 3-Control  -4.3333  -7.6606  -1.0061  0.0090 **
pH = 4-Control  -7.3333 -10.6606  -4.0061  9.9e-05 ***
pH = 5-Control  -8.0000 -11.3273  -4.6727  1.8e-05 ***
pH = 6-Control -33.0000 -36.3273 -29.6727 < 2e-16 ***
pH = 7-Control -86.3333 -89.6606 -83.0061 < 2e-16 ***
pH = 8-Control -86.3333 -89.6606 -83.0061 < 2e-16 ***
```

```
---
Signif. codes:  0 '***' 0.001 '**' 0.01 '*' 0.05 '.' 0.1 ' ' 1
[1] ""
[1] "#####"
[1] "#####"
[1] ""
[1] "TD5"
```



Figure S40. pH – TD5

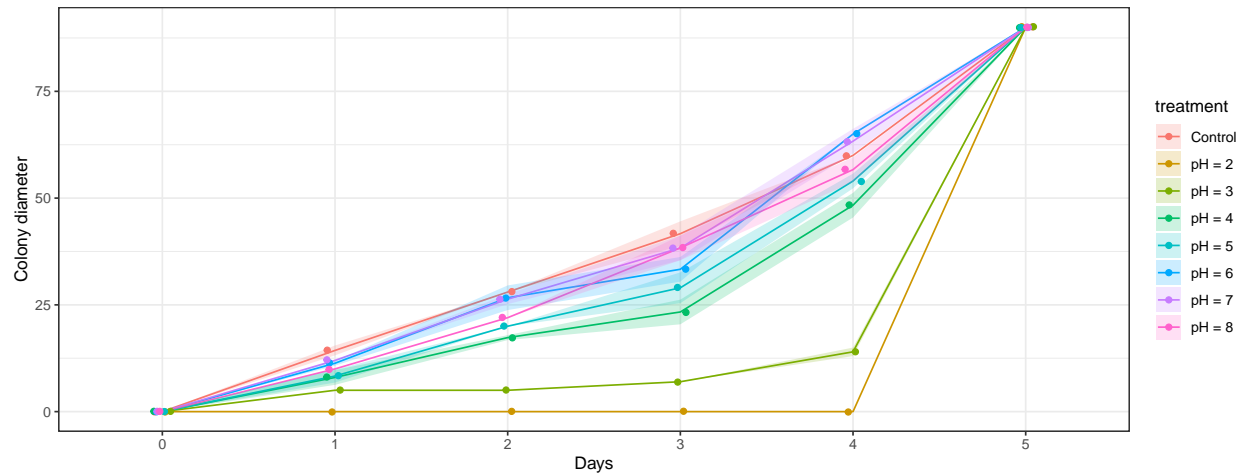

```
[1] "ANOVA results:"
              Df Sum Sq Mean Sq F value    Pr(>F)
data_stat_id$treatment  7  32596      4657      586 3.6e-16 ***
Residuals              14    111         8
---
Signif. codes:  0 '***' 0.001 '**' 0.01 '*' 0.05 '.' 0.1 ' ' 1
[1] ""
[1] "#####"
[1] ""
[1] "Dunnett-test results:"
```

Dunnett's test for comparing several treatments with a control :  
95% family-wise confidence level

```
$Control
      diff   lwr.ci   upr.ci    pval
pH = 2-Control  36.0000  26.263  45.73706 5.4e-08 ***
pH = 3-Control -113.0000 -119.885 -106.11486 < 2e-16 ***
pH = 4-Control  -47.0000  -53.885  -40.11486 < 2e-16 ***
pH = 5-Control  -32.6667  -39.552  -25.78153 1.5e-10 ***
pH = 6-Control   -7.6667  -14.552   -0.78153 0.0263 *
pH = 7-Control   -4.0000  -10.885    2.88514 0.4045
pH = 8-Control  -17.0000  -23.885  -10.11486 1.1e-05 ***
```

```
---
Signif. codes:  0 '***' 0.001 '**' 0.01 '*' 0.05 '.' 0.1 ' ' 1
[1] ""
[1] "#####"
[1] "#####"
[1] ""
[1] "TD6"
```

Figure S41. pH – TD6

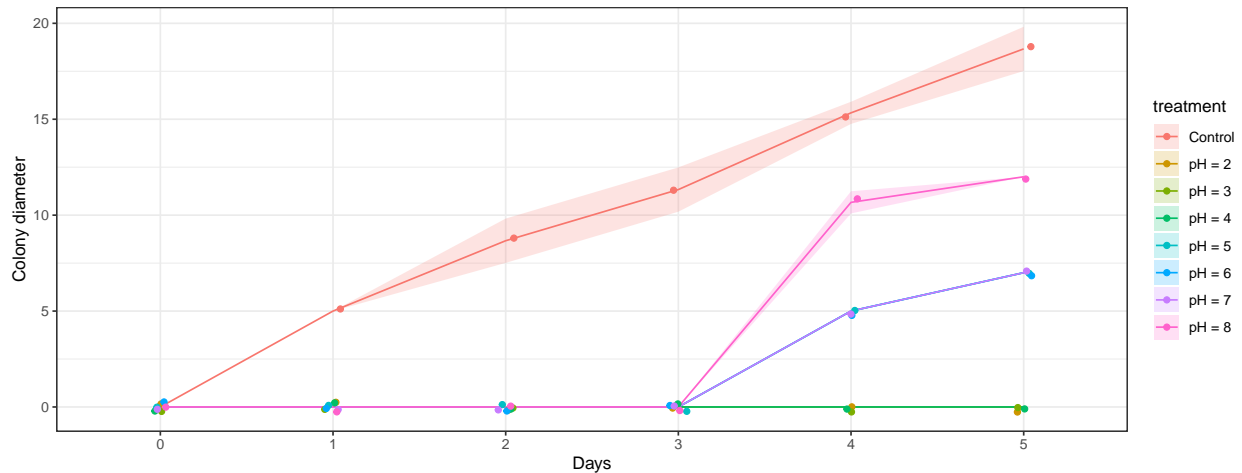

```
[1] "ANOVA results:"
              Df Sum Sq Mean Sq F value Pr(>F)
data_stat_id$treatment  7   7616    1088   5712 <2e-16 ***
Residuals              14     3      0
---
Signif. codes:  0 '***' 0.001 '**' 0.01 '*' 0.05 '.' 0.1 ' ' 1
[1] ""
[1] "#####"
[1] ""
[1] "Dunnett-test results:"

Dunnett's test for comparing several treatments with a control :
  95% family-wise confidence level
```

```
$Control
      diff lwr.ci upr.ci  pval
pH = 2-Control -59.000 -60.507 -57.493 <2e-16 ***
pH = 3-Control -59.000 -60.066 -57.934 <2e-16 ***
pH = 4-Control -59.000 -60.066 -57.934 <2e-16 ***
pH = 5-Control -47.000 -48.066 -45.934 <2e-16 ***
pH = 6-Control -47.000 -48.066 -45.934 <2e-16 ***
pH = 7-Control -47.000 -48.066 -45.934 <2e-16 ***
pH = 8-Control -36.333 -37.399 -35.268 <2e-16 ***
```

```
---
Signif. codes:  0 '***' 0.001 '**' 0.01 '*' 0.05 '.' 0.1 ' ' 1

[1] ""
[1] "#####"
[1] "#####"
[1] ""
[1] "TD8"
```

Figure S42. pH – TD8

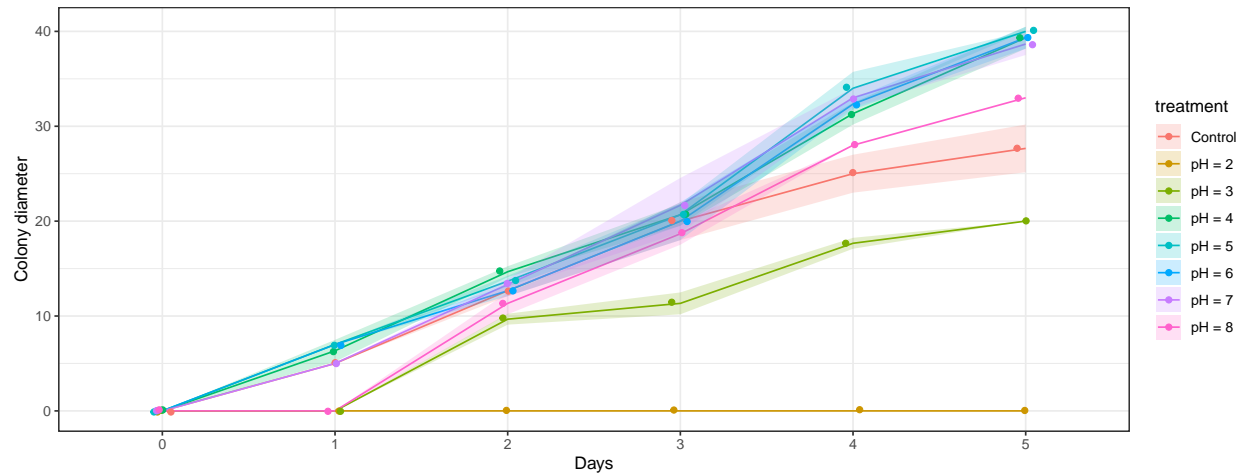

```
[1] "ANOVA results:"
```

```

              Df Sum Sq Mean Sq F value    Pr(>F)
data_stat_id$treatment  7  16859      2408      562 4.7e-16 ***
Residuals              14     60         4
---

```

```
Signif. codes:  0 '***' 0.001 '**' 0.01 '*' 0.05 '.' 0.1 ' ' 1
```

```
[1] ""
```

```
[1] "#####"
```

```
[1] ""
```

```
[1] "Dunnett-test results:"
```

```

Dunnett's test for comparing several treatments with a control :
95% family-wise confidence level

```

```

$Control
      diff   lwr.ci   upr.ci    pval
pH = 2-Control -90.33333 -97.4814 -83.1852 < 2e-16 ***
pH = 3-Control -31.66667 -36.7211 -26.6122 2.8e-15 ***
pH = 4-Control  22.00000  16.9455  27.0545 3.4e-11 ***
pH = 5-Control  25.00000  19.9455  30.0545 4.1e-10 ***
pH = 6-Control  21.00000  15.9455  26.0545 2.7e-09 ***
pH = 7-Control  21.33333  16.2789  26.3878 1.5e-11 ***
pH = 8-Control   0.66667  -4.3878   5.7211 0.9988

```

```
---
```

```
Signif. codes:  0 '***' 0.001 '**' 0.01 '*' 0.05 '.' 0.1 ' ' 1
```

```
[1] ""
```

```
[1] "#####"
```

```
[1] "#####"
```

```
[1] ""
```

```
[1] "TD9"
```

Figure S43. pH – TD9

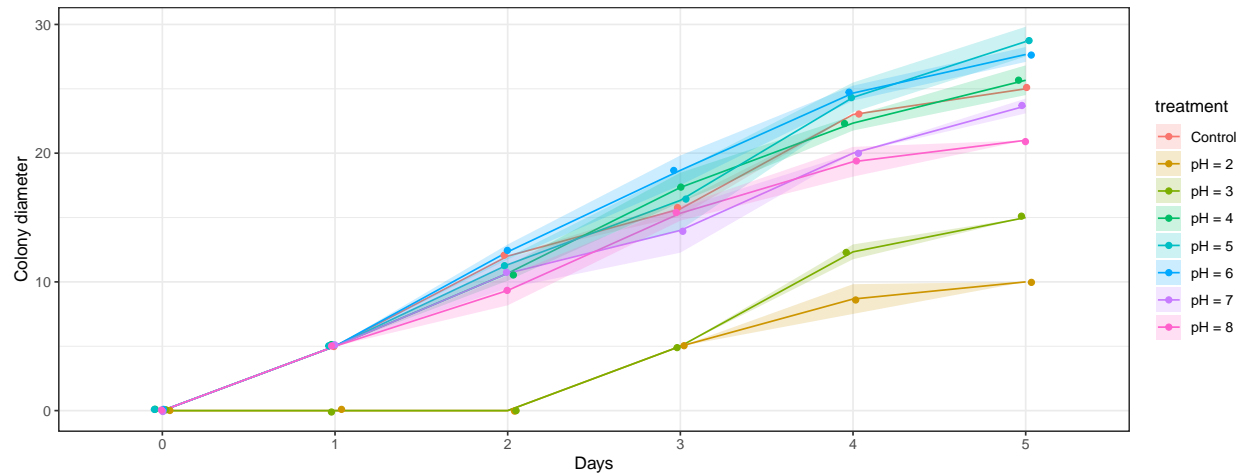

```
[1] "ANOVA results:"
              Df Sum Sq Mean Sq F value    Pr(>F)
data_stat_id$treatment  7   6548      935      265 8.7e-14 ***
Residuals              14     49        4
---
Signif. codes:  0 '***' 0.001 '**' 0.01 '*' 0.05 '.' 0.1 ' ' 1
[1] ""
[1] "#####"
[1] ""
[1] "Dunnett-test results:"
```

Dunnett's test for comparing several treatments with a control :  
95% family-wise confidence level

```
$Control
      diff    lwr.ci   upr.ci    pval
pH = 2-Control -9.66667 -16.14832  -3.1850  0.0032 **
pH = 3-Control -48.33333 -52.91655 -43.7501 < 2e-16 ***
pH = 4-Control  0.33333  -4.24988   4.9166  1.0000
pH = 5-Control  5.00000   0.41678   9.5832  0.0300 *
pH = 6-Control  7.66667   3.08345  12.2499  0.0010 **
pH = 7-Control -7.33333 -11.91655  -2.7501  0.0018 **
pH = 8-Control -10.66667 -15.24988  -6.0834  2.5e-05 ***
```

```
---
Signif. codes:  0 '***' 0.001 '**' 0.01 '*' 0.05 '.' 0.1 ' ' 1
[1] ""
[1] "#####"
[1] "#####"
[1] ""
```
